# Supplementary material for: Single cell RNA sequencing of human liver reveals distinct intrahepatic macrophage populations
Source: PubMed Central journal article supplement (PMC6197289; doi:10.1038/s41467-018-06318-7), 2018-10-22
Supplement: 41467_2018_6318_MOESM1_ESM.pdf [file 41467_2018_6318_MOESM1_ESM.pdf]

# Single cell RNA sequencing of human liver reveals distinct intrahepatic macrophage populations

Sonya A. MacParland, Jeff C. Liu, Xue-Zhong Ma, Brendan T. Innes, Agata M. Bartczak, Blair K. Gage, Justin Manuel, Nicholas Khuu, Juan Echeverri, Ivan Linares, Rahul Gupta, Michael L. Cheng, Lewis Y. Liu, Damra Camat, Sai W. Chung, Rebecca K. Seliga, Zigong Shao, Elizabeth Lee, Shinichiro Ogawa, Mina Ogawa, Michael D. Wilson, Jason E. Fish, Markus Selzner, Anand Ghanekar, David Grant, Paul Greig, Gonzalo Sapisochin, Nazia Selzner, Neil Winegarden, Oyedele Adeyi, Gordon Keller, Gary D. Bader and Ian D. McGilvray

| <b>List of Supplementary Figures</b>                                                                                                                  | <b>Page</b> |
|-------------------------------------------------------------------------------------------------------------------------------------------------------|-------------|
| <b>Supplementary Figure 1: Fractionation of the total liver homogenate samples into parenchymal and non-parenchymal cells leads to cell loss.....</b> | <b>3</b>    |
| <b>Supplementary Figure 2: Sample quality control.....</b>                                                                                            | <b>5</b>    |
| <b>Supplementary Figure 3: Heat map analysis showing the number of genes detected per cell.....</b>                                                   | <b>6</b>    |
| <b>Supplementary Figure 4: Cluster map analysis showing the 6 different mitochondrial transcript cut-offs.....</b>                                    | <b>7</b>    |
| <b>Supplementary Figure 5: Additional cells which appear at various mitochondrial cut-offs.....</b>                                                   | <b>8</b>    |
| <b>Supplementary Figure 6: Doublet Filtering.....</b>                                                                                                 | <b>9</b>    |
| <b>Supplementary Figure 7: Hematoxylin and eosin and Masson's trichrome staining of human liver parenchyma.....</b>                                   | <b>10</b>   |
| <b>Supplementary Figure 8: Similarity of human hepatocyte clusters to known mouse liver sinusoid layers.....</b>                                      | <b>12</b>   |
| <b>Supplementary Figure 9: t-SNE plots showing the relative distribution of commonly expressed hepatocyte genes in the healthy liver.....</b>         | <b>14</b>   |
| <b>Supplementary Figure 10: Pair-wise analysis of AFP+ and AFP- cells in all hepatocyte clusters (Clusters 1, 3, 5, 6, 14, 15).....</b>               | <b>15</b>   |
| <b>Supplementary Figure 11: t-SNE plots showing the relative distribution of commonly expressed endothelial cell genes in the healthy liver.....</b>  | <b>17</b>   |
| <b>Supplementary Figure 12: Pair-wise pathway analysis of liver endothelial cell populations 11 and 13 reveal few unique pathways activated.....</b>  | <b>18</b>   |
| <b>Supplementary Figure 13: Pair-wise pathway analysis of liver endothelial cell populations 12 and 13 reveal unique pathways activated.....</b>      | <b>19</b>   |
| <b>Supplementary Figure 14: t-SNE plots showing the relative distribution of commonly expressed macrophage genes in the healthy liver.....</b>        | <b>20</b>   |
| <b>Supplementary Figure 15. Gating Strategy for Fig. 8d.....</b>                                                                                      | <b>22</b>   |
| <b>Supplementary Figure 16: Representative partitioning of lobules for immunohistochemistry (Figure 8 e-f).....</b>                                   | <b>23</b>   |
| <b>Supplementary Figure 17: Distribution of macrophages by CD68 (general macrophage marker) vs. MARCO (non-inflammatory KCs).....</b>                 | <b>25</b>   |
| <b>Supplementary Figure 18: Cell cycle phase in each cluster.....</b>                                                                                 | <b>26</b>   |
| <b>Supplementary Figure 19: T and NK-like cell sub-analysis reveals additional distinct populations.....</b>                                          | <b>27</b>   |
| <b>Supplementary Figure 20: Heat map analysis showing gene expression profiles of liver resident macrophages/Kupffer cells.....</b>                   | <b>29</b>   |
| <b>Supplementary Figure 21: Heat map analysis showing gene expression profiles of NK-like and B cells.....</b>                                        | <b>30</b>   |

|                                                                                                                                   |           |
|-----------------------------------------------------------------------------------------------------------------------------------|-----------|
| <b>Supplementary Figure 22: Heat map analysis showing gene expression profiles of T cells.....</b>                                | <b>31</b> |
| <b>Supplementary Figure 23: Heat map analysis showing gene expression profiles of hepatic stellate cells. ....</b>                | <b>32</b> |
| <b>Supplementary Figure 24: Heat map analysis showing gene expression profiles of endothelial cells and cholangiocytes. ....</b>  | <b>33</b> |
| <b>Supplementary Figure 25: 10x Genomics Cell Ranger software summaries of unfiltered data from total liver homogenate 1.....</b> | <b>34</b> |
| <b>Supplementary Figure 26: 10x Genomics Cell Ranger software summaries of unfiltered data from total liver homogenate 2.....</b> | <b>35</b> |
| <b>Supplementary Figure 27: 10x Genomics Cell Ranger software summaries of unfiltered data from total liver homogenate 3.....</b> | <b>36</b> |
| <b>Supplementary Figure 28: 10x Genomics Cell Ranger software summaries of unfiltered data from total liver homogenate 4.....</b> | <b>37</b> |
| <b>Supplementary Figure 29: 10x Genomics Cell Ranger software summaries of unfiltered data from total liver homogenate 5.....</b> | <b>38</b> |

**List of Supplementary Tables**

|                                                                                |           |
|--------------------------------------------------------------------------------|-----------|
| <b>Supplementary Table 1: Neurologically deceased liver donor details.....</b> | <b>39</b> |
|--------------------------------------------------------------------------------|-----------|

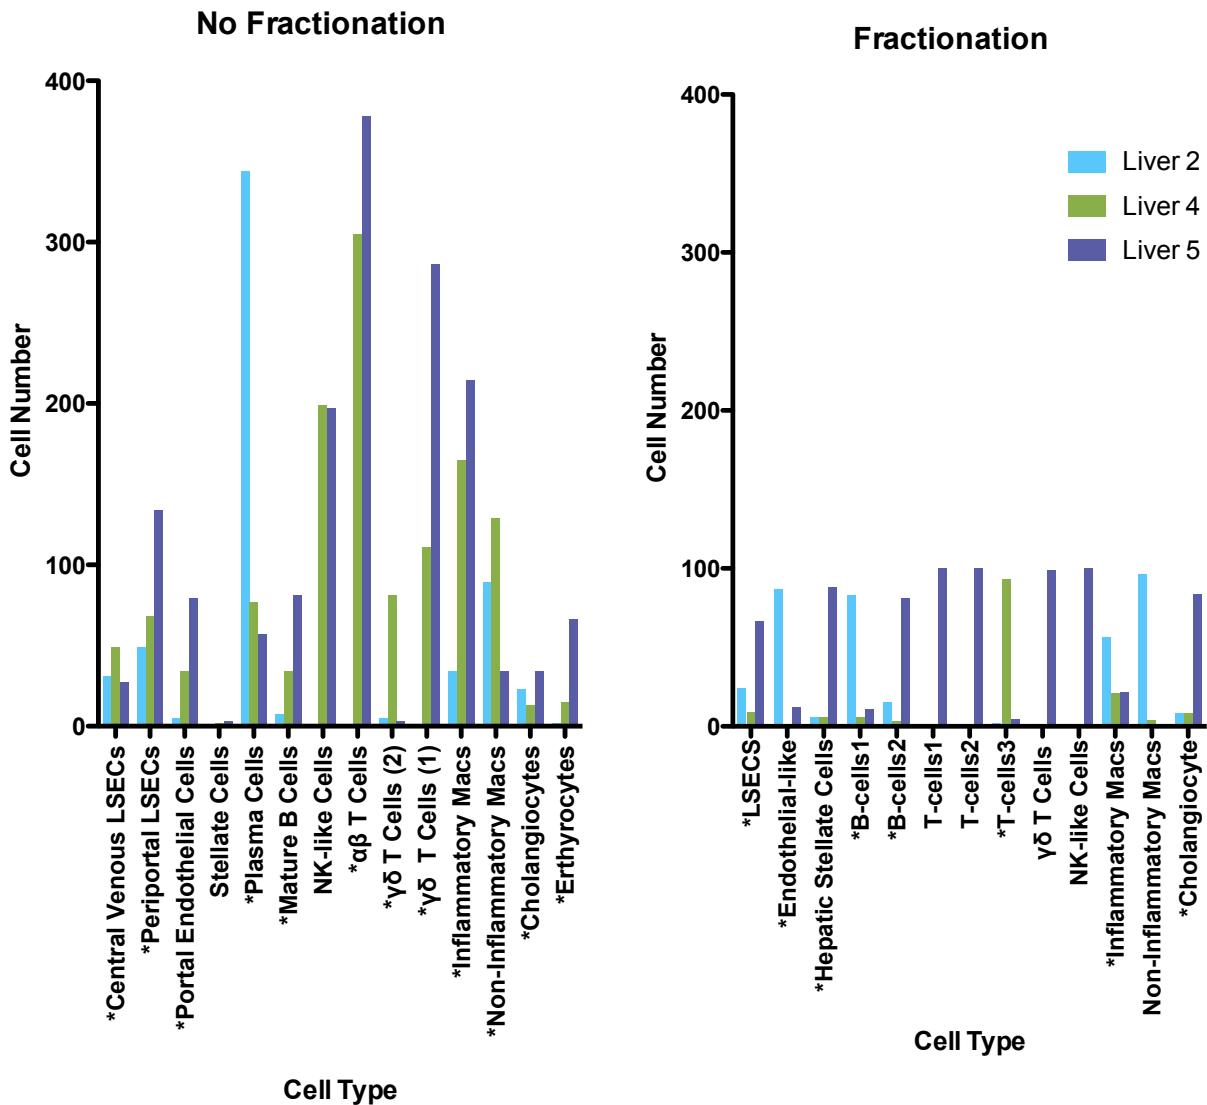

**Supplementary Figure 1: Fractionation of the total liver homogenate samples into parenchymal and non-parenchymal cells leads to cell loss.** Graphical summary of the proportion of cells that contributed to each cluster by liver sample. The left distribution is derived from the total liver homogenate. The right distribution is derived from non-parenchymal cells generated using a 50 x *g* centrifugation step and wash steps to remove hepatocytes. Asterisks denote clusters where cell from all three livers are represented. In both fractionated and unfractionated samples, 6000 cells were targeted for scRNA-seq analysis, however, the total number of viable cells analyzed after filtering out low quality cells was considerably less for fractionated cells, suggesting that these manipulations decreased overall cell viability.

| A.    | Viability of total liver homogenate by trypan blue exclusion | Cells in suspension targeted for sequencing (viable by trypan blue exclusion) | Filtered for Library Size > 1500 | Filtered for Mitochondrial Proportion < 50% | Percent of cells in suspension passing QC filters |
|-------|--------------------------------------------------------------|-------------------------------------------------------------------------------|----------------------------------|---------------------------------------------|---------------------------------------------------|
| P1TLH | 71%                                                          | 6000                                                                          | 3672                             | 1073                                        | 17.9%                                             |
| P2TLH | 49%                                                          | 6000                                                                          | 1351                             | 1331                                        | 22.2%                                             |
| P3TLH | 56%                                                          | 6000                                                                          | 4345                             | 3255                                        | 54.3%                                             |
| P4TLH | 90%                                                          | 6000                                                                          | 2072                             | 1532                                        | 25.6%                                             |
| P5TLH | 56%                                                          | 6000                                                                          | 5653                             | 1764                                        | 29.4%                                             |

B.

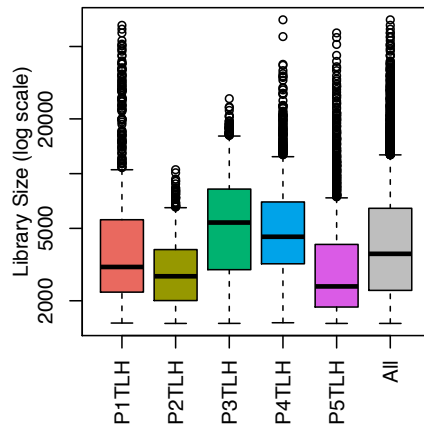

C.

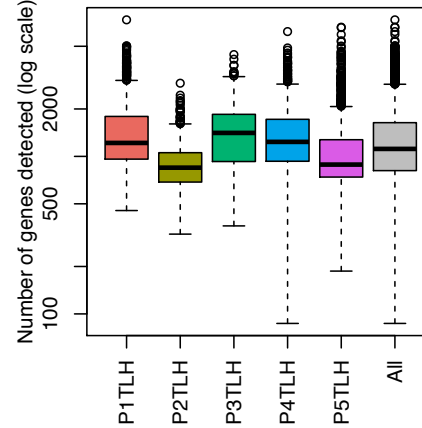

D.

Medians: ● P1TLH ● P2TLH ● P3TLH ● P4TLH ● P5TLH ● All

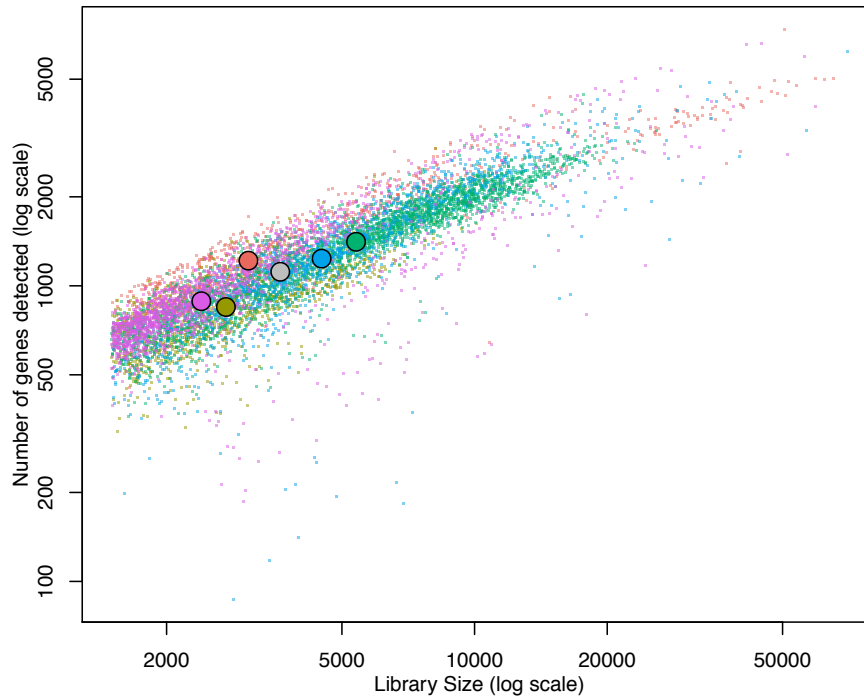

E.

| Patient  | Mean Library Size (UMIs) | Mean Genes Detected |
|----------|--------------------------|---------------------|
| P1TLH    | 5951                     | 1537                |
| P2TLH    | 3122                     | 906                 |
| P3TLH    | 6043                     | 1444                |
| P4TLH    | 6021                     | 1407                |
| P5TLH    | 4164                     | 1149                |
| All TLHs | 5227                     | 1313                |

**Supplementary Figure 2: Sample quality control.** A). From viable cells in the total liver homogenate, as determined by trypan blue exclusion, that were targeted for sequencing, cells were first filtered for library size, then mitochondrial proportion as outlined in the methods. After passing the mitochondrial transcript threshold, all remaining cells per patient were used in downstream analysis. There was an average of 24% recovery rate, with patient 3 as the obvious outlier.

B-E) After removal of cells with more than 50% of transcripts from mitochondria and a library size less than 1500, there was an average library size of 5227 and a mean genes detected per cell of 1313 genes.

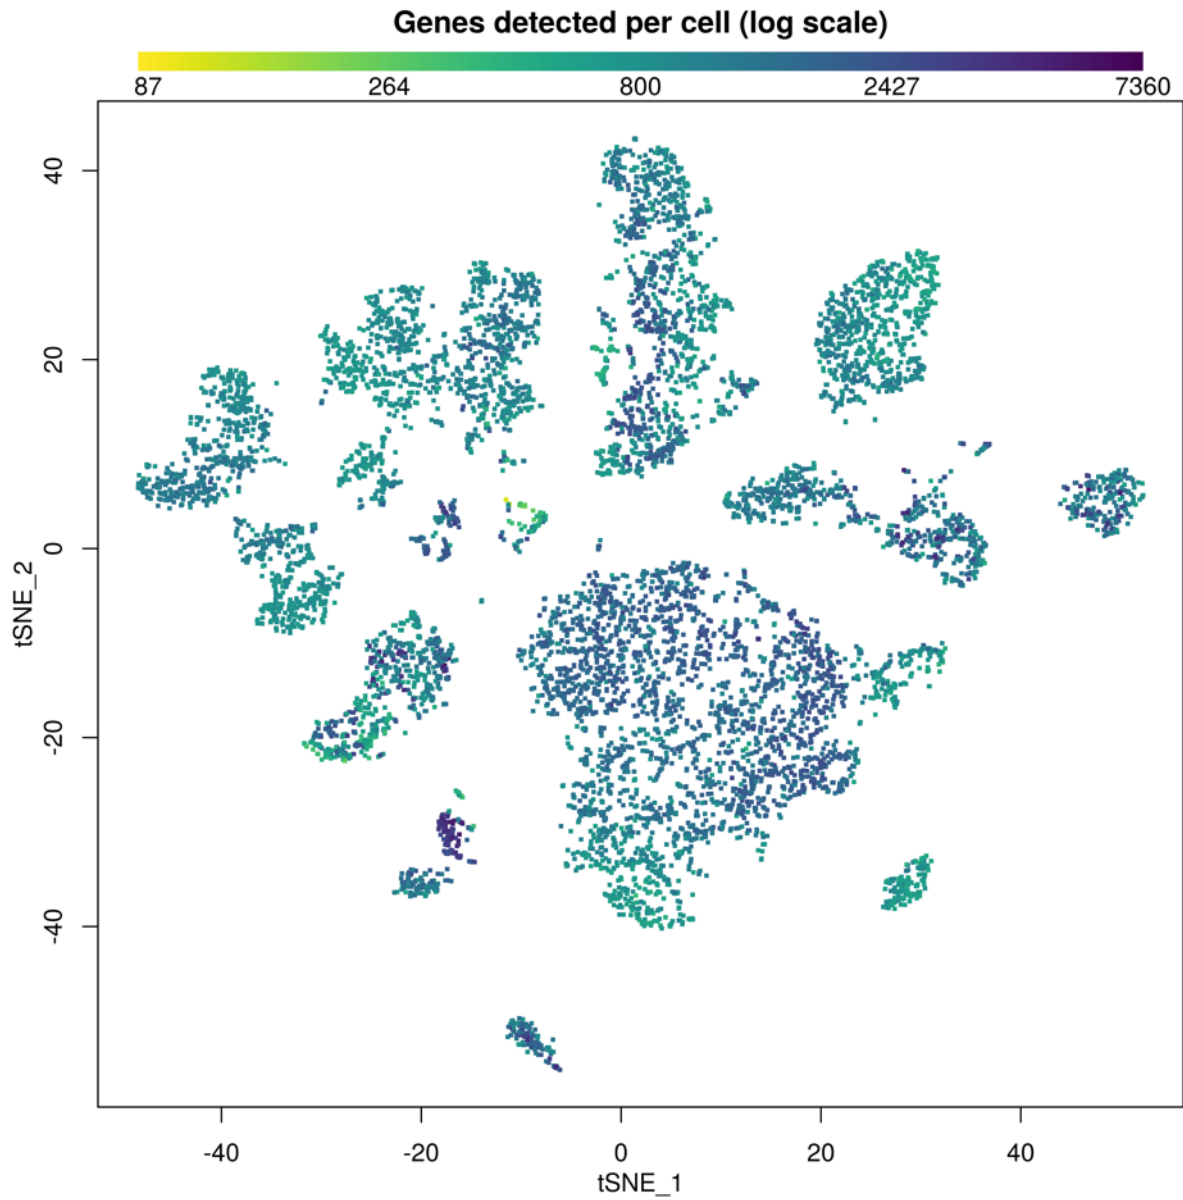

**Supplementary Figure 3: Heat map analysis showing the number of genes detected per cell.**

Mitochondrial Cut-off at 0.1

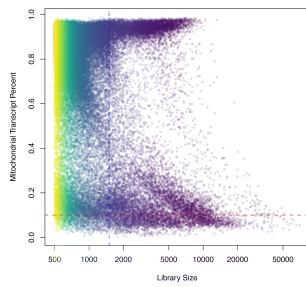

Labelled by Cluster#: 2865 Cells

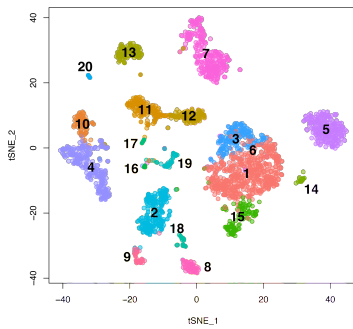

Mitochondrial Cut-off at 0.2

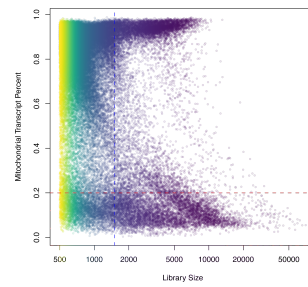

Labelled by Cluster#: 6378 Cells

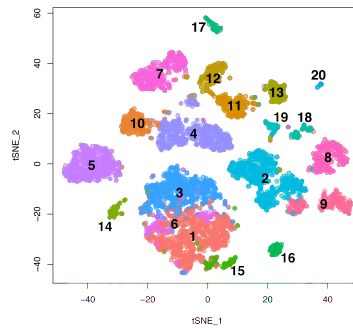

Mitochondrial Cut-off at 0.3

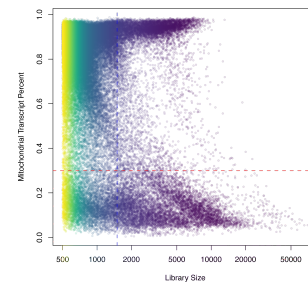

Labelled by Cluster#: 7668 Cells

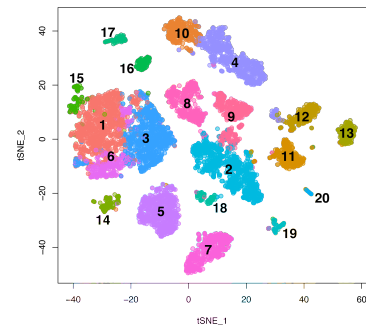

Mitochondrial Cut-off at 0.4

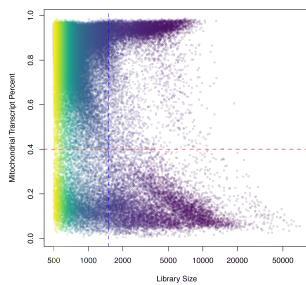

Labelled by Cluster#: 8079 Cells

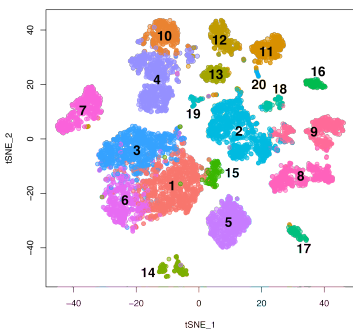

Mitochondrial Cut-off at 0.5

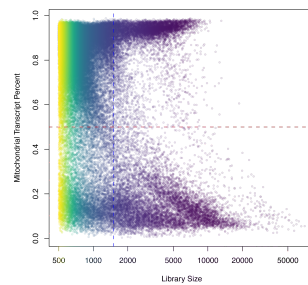

Labelled by Cluster#: 8444 Cells

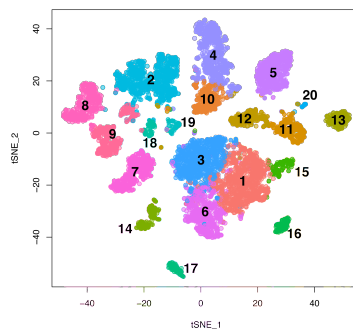

Mitochondrial Cut-off at 0.6

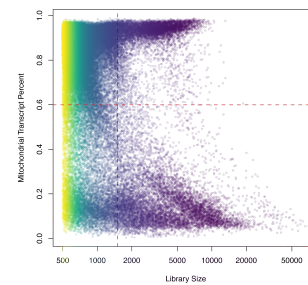

Labelled by Cluster#: 8723 Cells

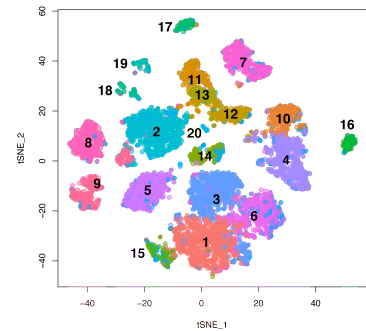

**Supplementary Figure 4: Cluster map analysis showing the 6 different mitochondrial transcript cut-offs.** In all mitochondrial cut-offs (0.1, 0.2, 0.3, 0.4, 0.5, and 0.6), we have cells from all 20 clusters identified. All clusters (except cluster #6 at 0.1 cutoff) are identified as unique populations in tSNE plot at all cutoffs.

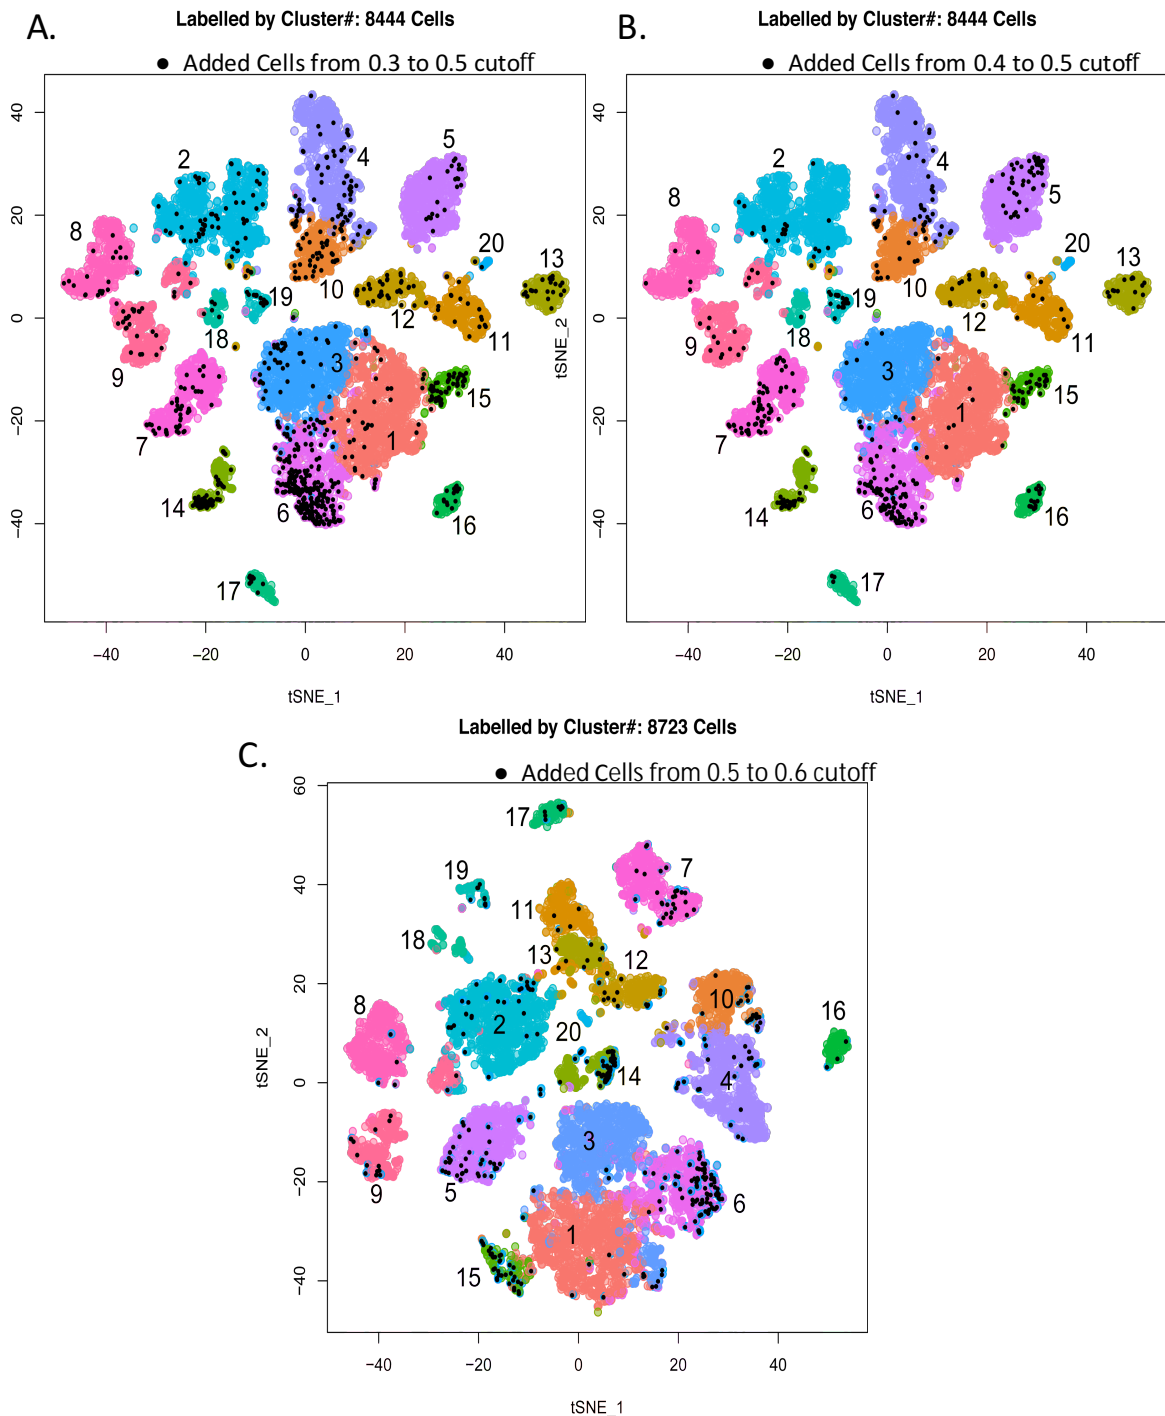

**Supplementary Figure 5: Additional cells which appear at various mitochondrial cut-offs.** Additional cells from mitochondrial cutoffs: A) 0.3 to 0.5; B) 0.4 to 0.5; and C) 0.5 to 0.6; are found in almost all clusters. This analysis clearly shows that no one cluster or type of cell (hepatocytes) seems biased to include additional cells by changing the mitochondrial transcript threshold. Altogether, our results indicate that the cell clusters identified at 0.5 cutoff is robust and consistent.



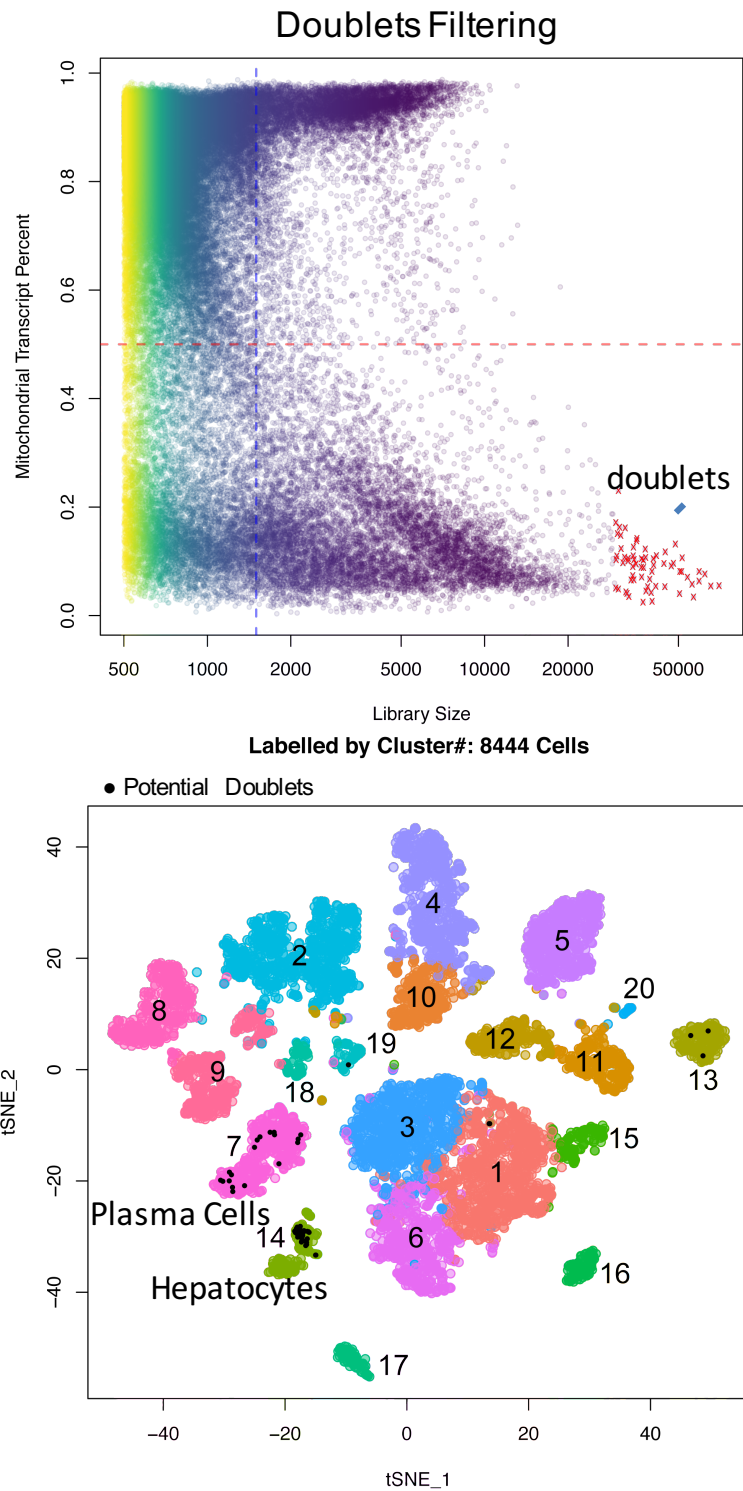

**Supplementary Figure 6: Doublet Filtering.** We did not apply doublet filtering because there are naturally occurring binucleated hepatocytes in liver and it will be very difficult to distinguish doublets and binucleated cells. Due to the heterogeneity of the liver tissue, it is unlikely that true doublets (with many possible cell type combinations) will result in one unique cluster on tSNE plot. The fact that we see most of the “supposed doublets” are concentrated in the Hepatocyte (cluster #14) and plasma cell (cluster #7) populations indicates these are likely biological cell types.

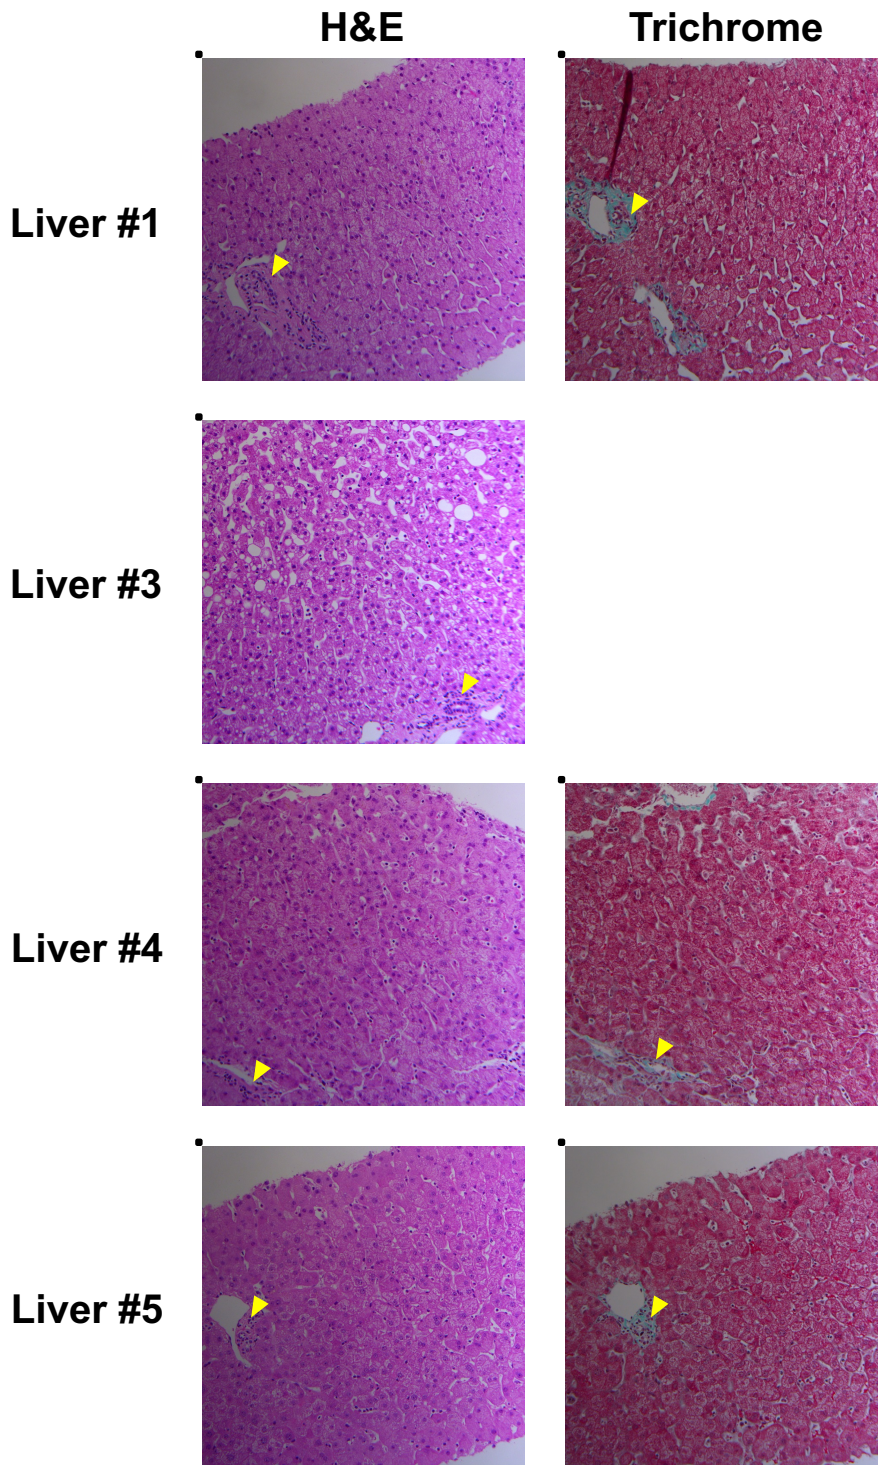

**Supplementary Figure 7: Hematoxylin and eosin and Masson's trichrome staining of human liver parenchyma.** Livers #1, #4, and #5 show preserved microstructure and absence of steatosis, inflammation, or other abnormality. Liver #3 shows the same normal structure with approximately 5-10% fat, which is acceptable for cadaveric donation. Yellow triangles show portal tracts. Original magnification: 100x. Masson's trichrome staining was not performed on Liver #3.

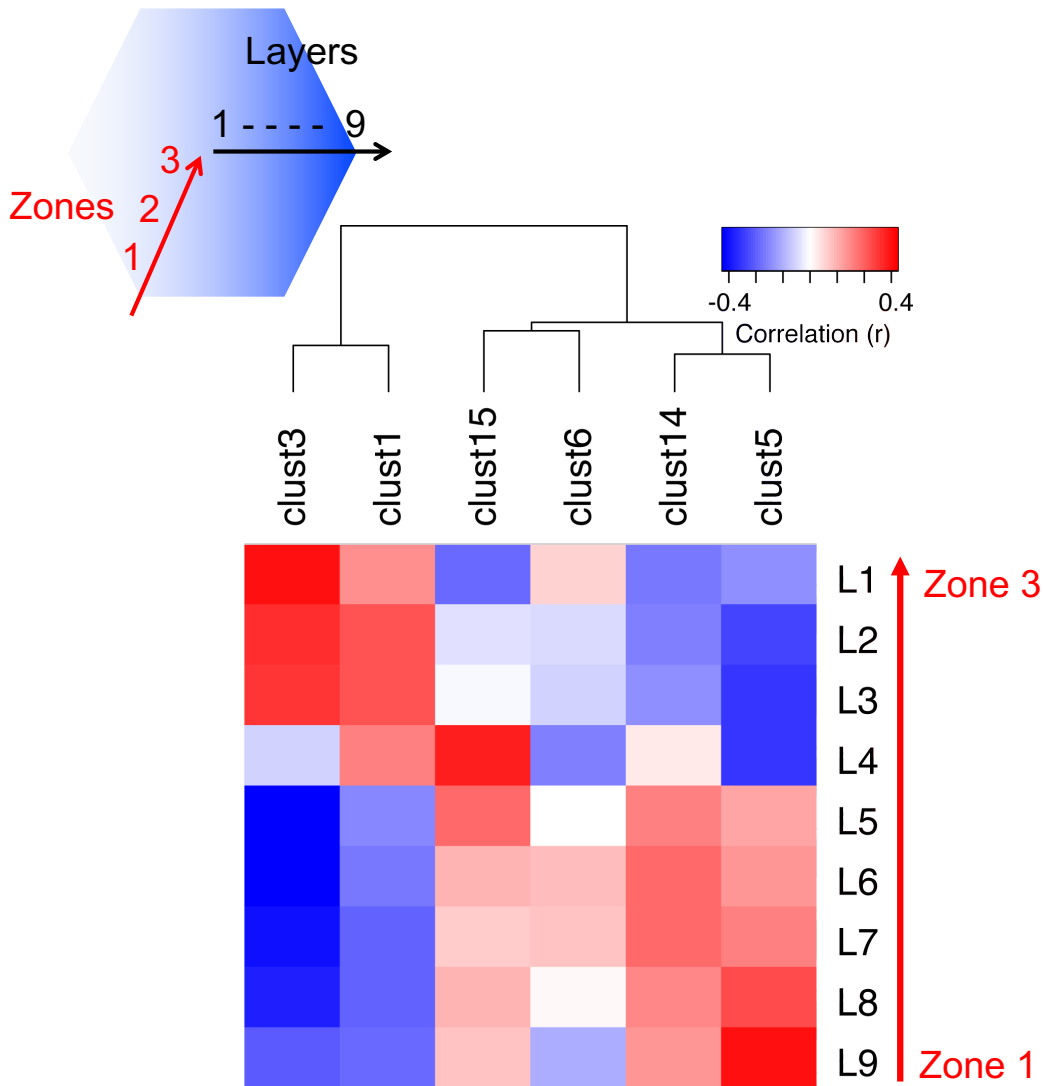

Correlation with highly significant genes (n = 94)  
FDR q-values < 1.0 x 10<sup>-25</sup>

| Correlation | Clust3   | Clust1 | Clust15 | Clust6 | Clust14 | Clust5 |
|-------------|----------|--------|---------|--------|---------|--------|
| <b>L1</b>   | 0.36***  | 0.18   | -0.16   | 0.09   | -0.15   | -0.11  |
| <b>L2</b>   | 0.31**   | 0.26*  | -0.01   | -0.02  | -0.14   | -0.22* |
| <b>L3</b>   | 0.27**   | 0.24*  | 0.01    | -0.03  | -0.12   | -0.23* |
| <b>L4</b>   | -0.05    | 0.11   | 0.21*   | -0.12  | 0.01    | -0.20  |
| <b>L5</b>   | -0.44*** | -0.22* | 0.19    | -0.04  | 0.16    | 0.10   |
| <b>L6</b>   | -0.38*** | -0.21* | 0.07    | 0.06   | 0.17    | 0.11   |
| <b>L7</b>   | -0.31**  | -0.21* | 0.04    | 0.04   | 0.15    | 0.13   |
| <b>L8</b>   | -0.30**  | -0.22* | 0.06    | -0.02  | 0.12    | 0.19   |
| <b>L9</b>   | -0.21    | -0.19  | 0.04    | -0.12  | 0.09    | 0.24*  |

\*\*\*P<0.001, \*\*P<0.01, \*P<0.05.

**Supplementary Figure 8: Similarity of human hepatocyte clusters to known mouse liver sinusoid layers.** Homologous genes between mouse and human were first identified using Ensembl databases by the getLDS function in the BioConductor package BioMart. Using the average values of nine layers of mouse liver cells provided in the Halpern study (Halpern et al., Nature, 2017), highly significant genes (q-values <  $1.0 \times 10E-25$ , n = 94) were selected for correlation. Expression values of each gene among the six clusters of human hepatocytes and nine layers of mouse liver cells were then scaled and centered (separately in human and mouse) by z-scores. Finally, Pearson correlation was calculated using z-scores to compare the six human hepatocytes clusters with nine layers of mouse liver cells.

# Hepatocyte Markers

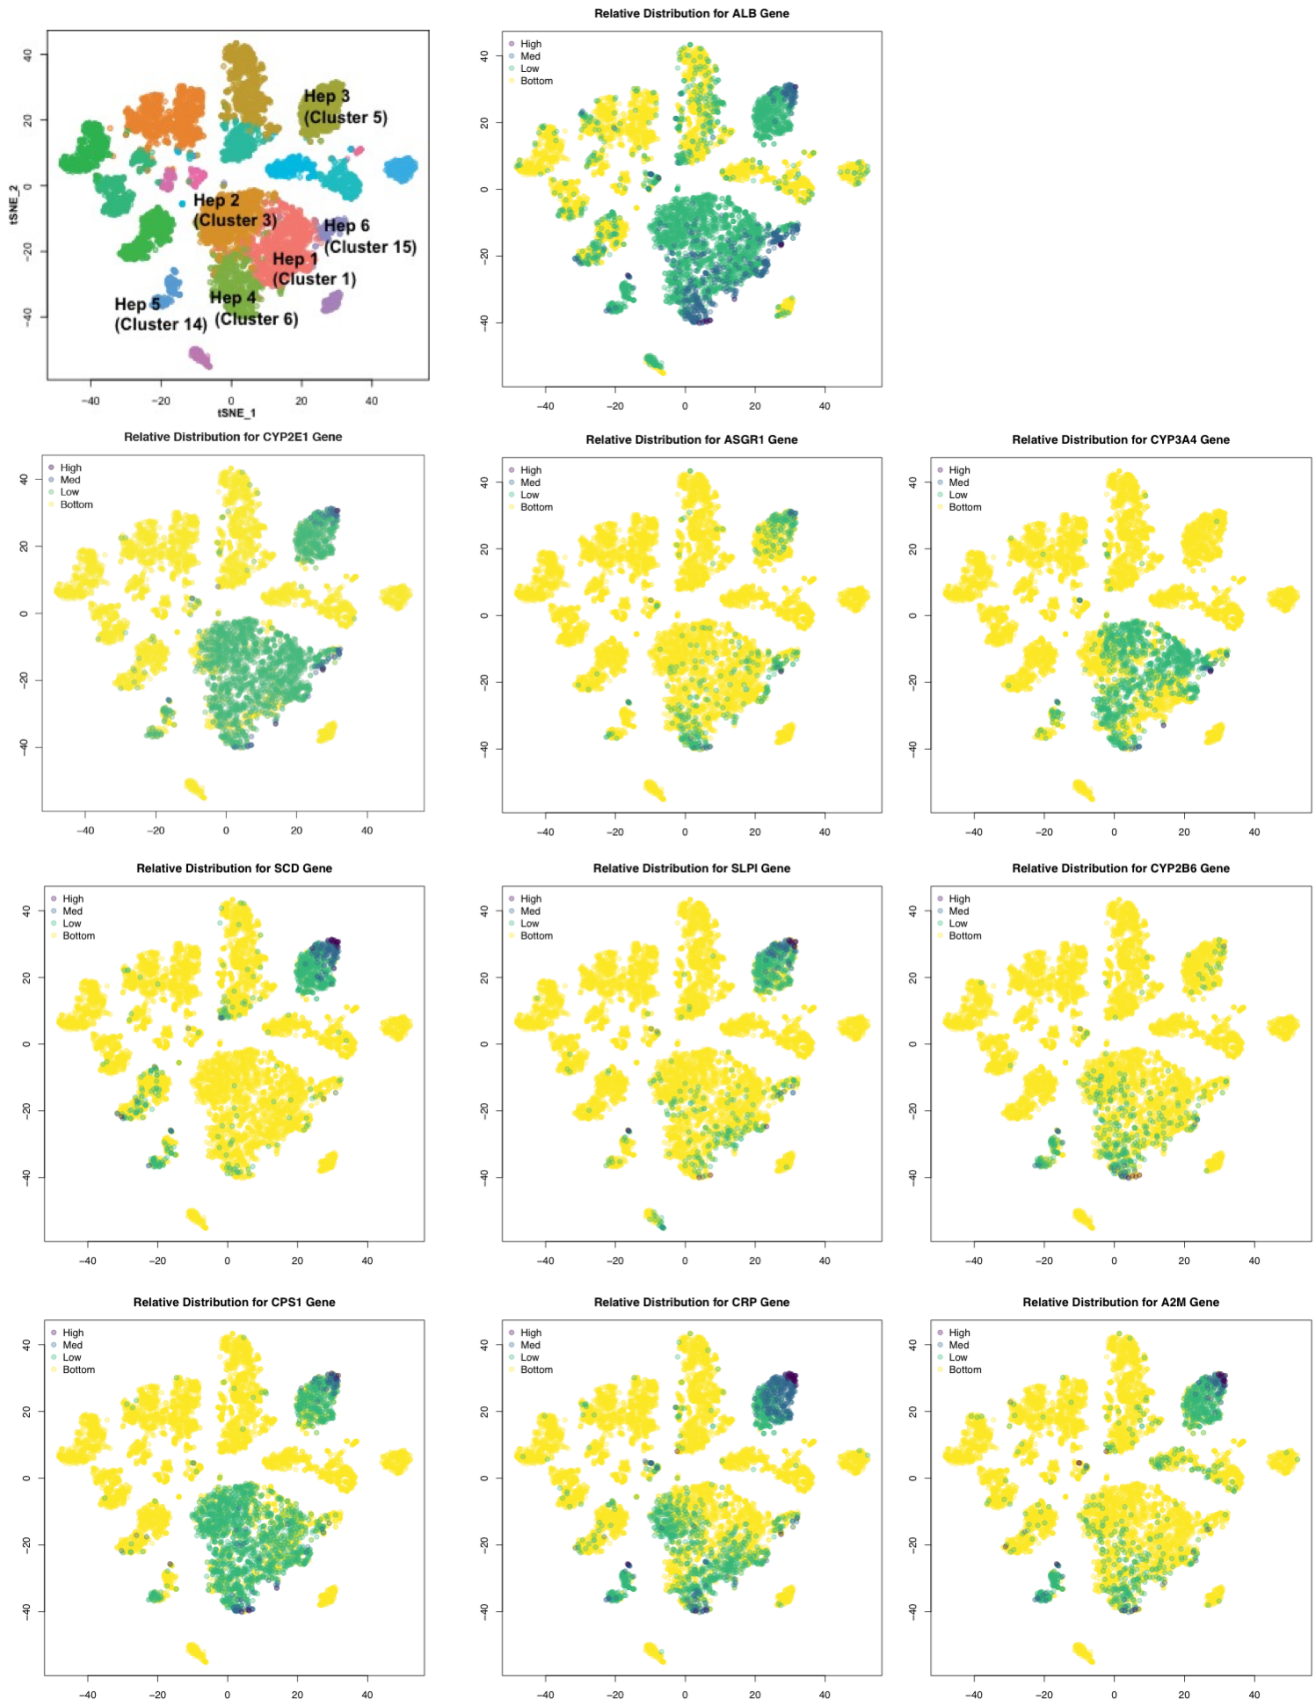

**Supplementary Figure 9: t-SNE plots showing the relative distribution of commonly expressed hepatocyte genes in the healthy liver.** Legend for relative expression of each marker from lowest expression (yellow dots) to highest expression (Purple dots) (top left).

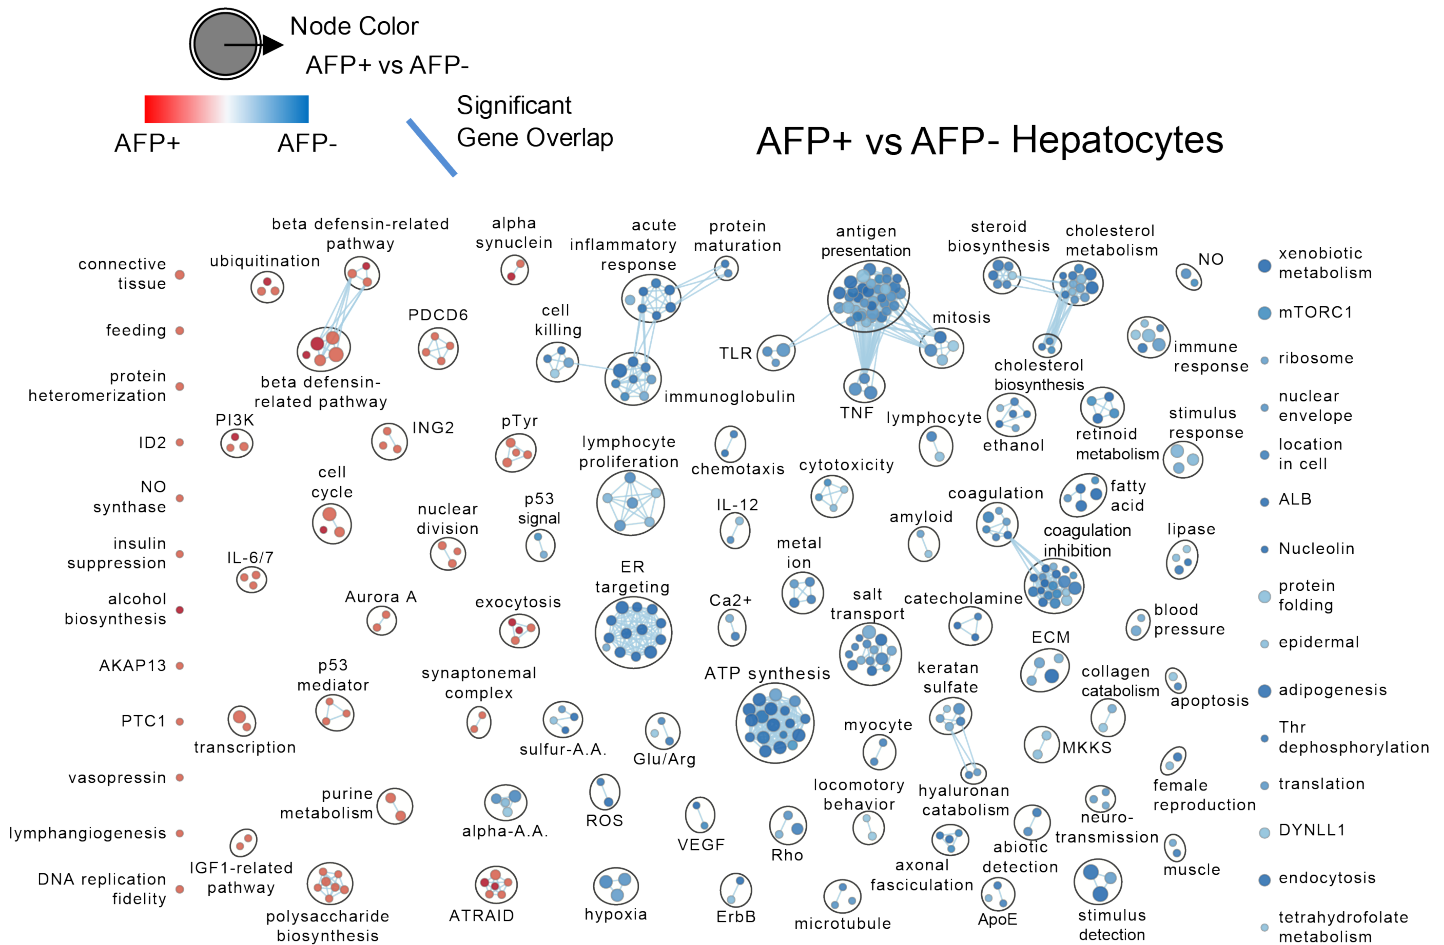

**Supplementary Figure 10: Pair-wise analysis of AFP+ and AFP- cells in all hepatocyte clusters (Clusters 1, 3, 5, 6, 14, 15).** Pair-wise pathway enrichment analysis using GSEA software on AFP<sup>-</sup> cells in clusters 1, 3, 5, 6, 14 & 15 defined in Fig 2f compared to AFP<sup>+</sup> cells (shown in Fig. 4c.v.). Pathways enriched in AFP<sup>+</sup> cells are labeled in red and pathways enriched AFP<sup>-</sup> cells are indicated in blue. The size of the node represents the number of genes in a particular pathway (black circle). Blue lines depict intra- and inter-pathway relationships according to the number of genes shared between each pathway. Log<sub>2</sub> CPM cut-off to separate AFP<sup>+</sup> (Low/Medium and High expression) and AFP<sup>-</sup> (Bottom expression) was 1.668 CPM. This cut-off was determined automatically by binning in R (cut function). The data shows that active cellular pathways in AFP<sup>-</sup> are typical of mature hepatocytes while AFP<sup>+</sup> cells were enriched for cellular pathways including cell cycle, nuclear division, IL-6/7 suggesting that these may be hepatic progenitors.

# Endothelial Cell Markers

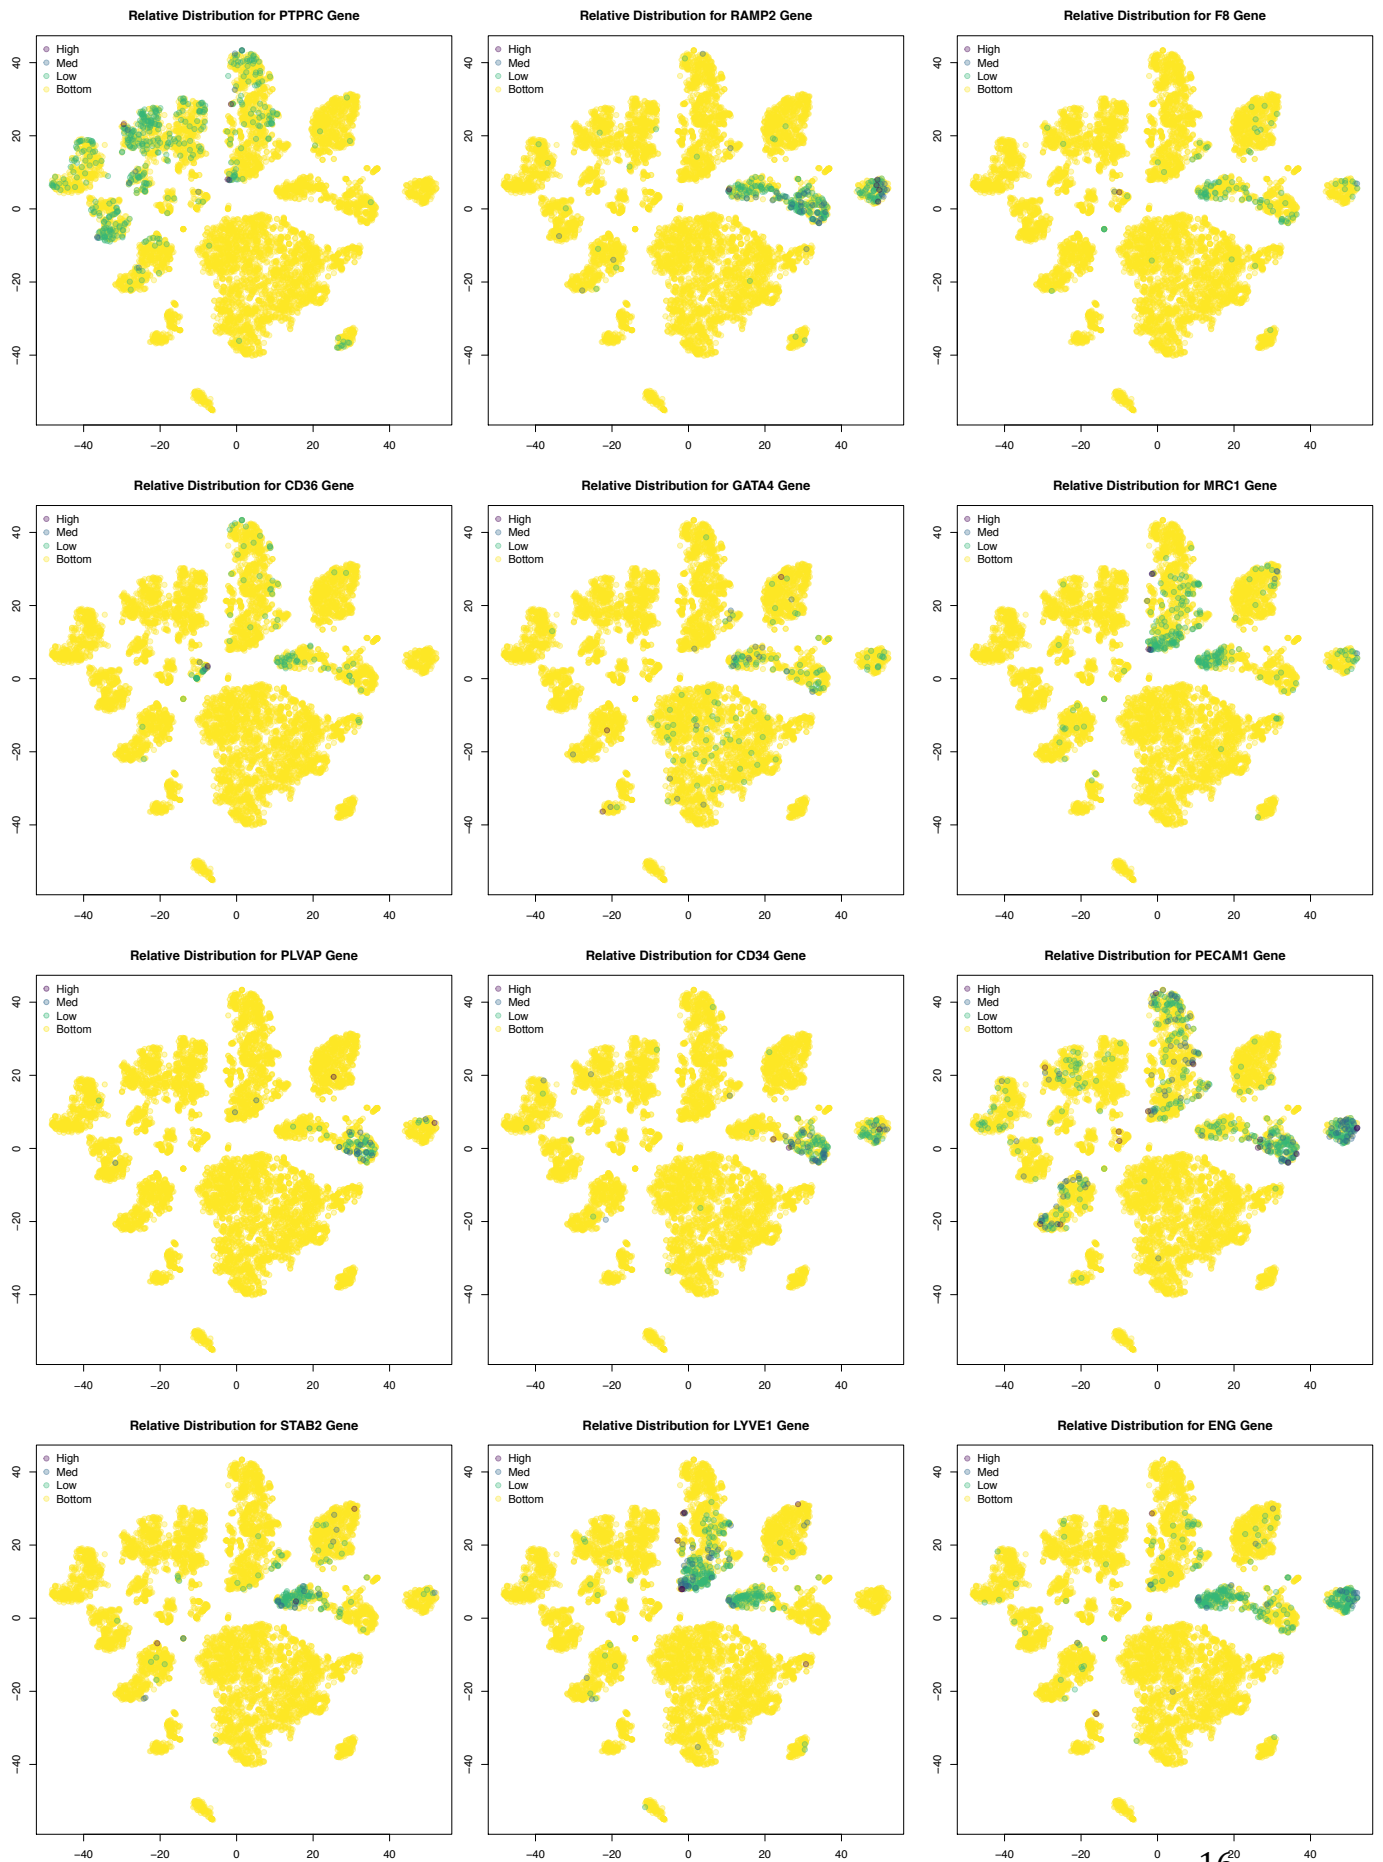



**Supplementary Figure 11: t-SNE plots showing the relative distribution of commonly expressed endothelial cell genes in the healthy liver.** Legend for relative expression of each marker from lowest expression (yellow dots) to highest expression (purple dots) (top left).

## Endothelial Cell Clusters

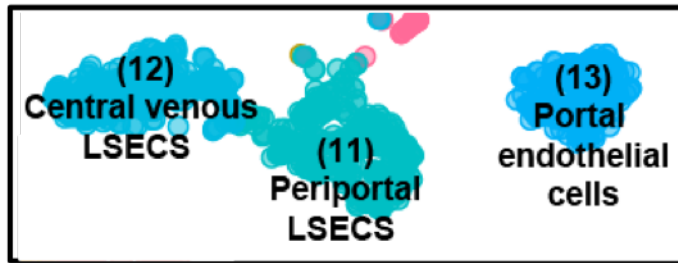

### Pairwise Comparison (Cluster 11 vs 13)

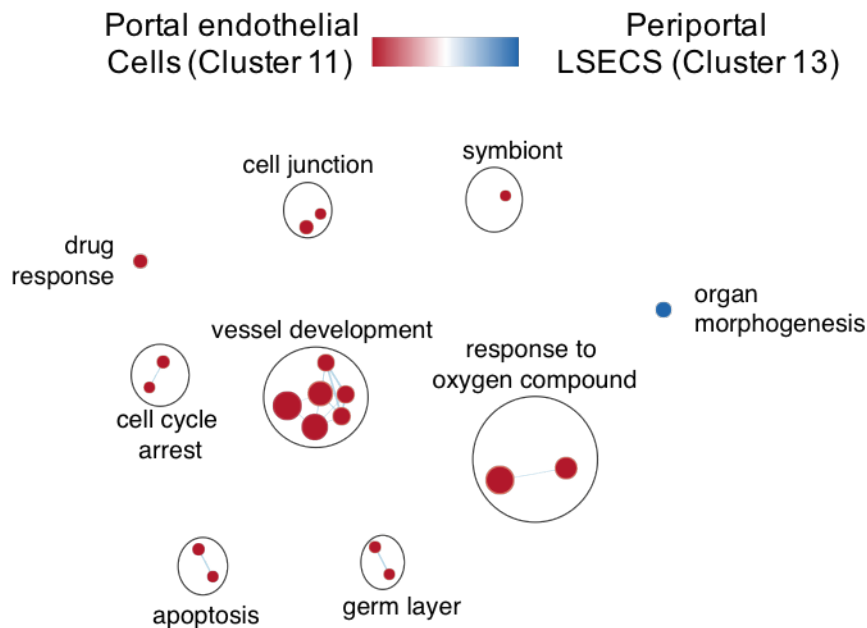

**Supplementary Figure 12: Pair-wise pathway analysis of liver endothelial cell populations 11 and 13 reveal few unique pathways activated.** Pair-wise pathway enrichment analysis using GSEA software on the clusters 11 and 13 defined in Fig 2f. Pathways enriched (pairwise analysis explained in the legend to Figure 5d) in periportal LSECs are labelled in blue and pathways enriched in portal endothelial cells are indicated in red. The size of the node represents the number of genes in a particular pathway (black circle). Blue lines depict intra- and inter-pathway relationships according to the number of genes shared between each pathway.

## Endothelial Cell Clusters

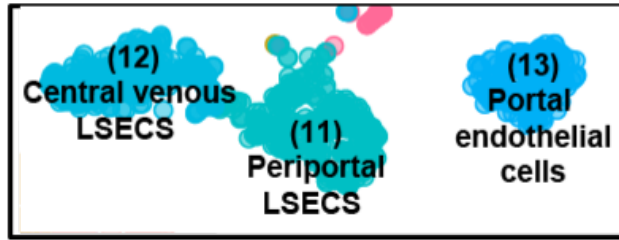

### Pairwise Comparison (Cluster 13 vs 12)

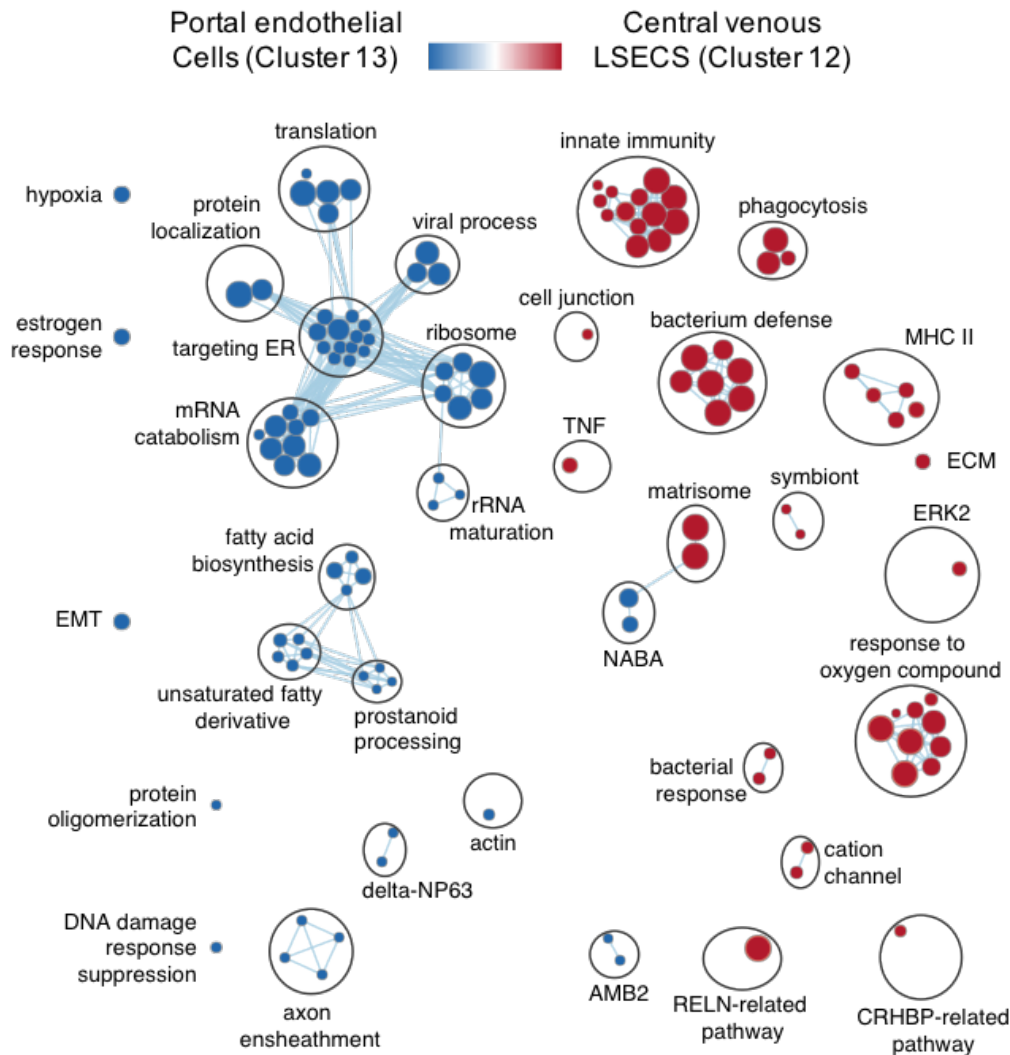

**Supplementary Figure 13: Pair-wise pathway analysis of liver endothelial cell populations 12 and 13 reveal unique pathways activated.** Pair-wise pathway enrichment analysis using GSEA software on the clusters 12 and 13 defined in Fig 2. Pathways enriched in portal endothelial cells are labelled in blue and pathways enriched in central venous LSECs are indicated in red. The size of the node represents the number of genes in a particular pathway (black circle). Blue lines depict intra- and inter-pathway relationships according to the number of genes shared between each pathway.

## Kupffer Cell/ Macrophage Markers

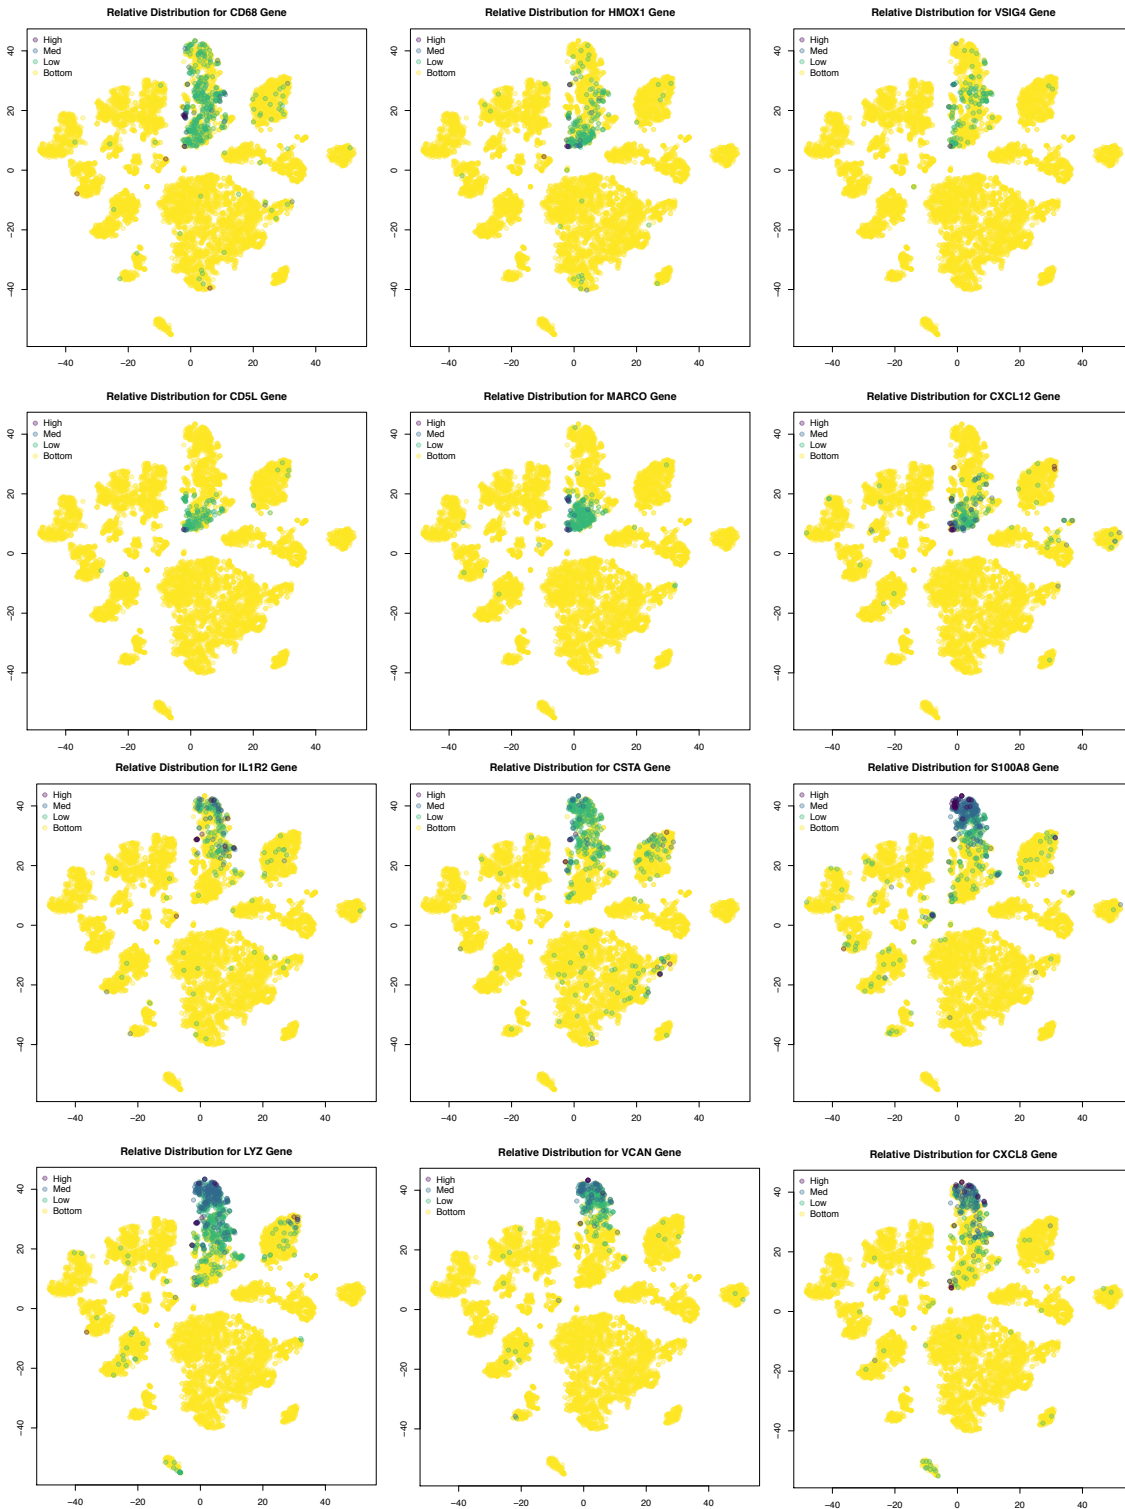

**Supplementary Figure 14: t-SNE plots showing the relative distribution of commonly expressed macrophage genes in the healthy liver. Legend for relative expression of each marker from lowest expression (yellow dots) to highest expression (purple dots) (top left).**

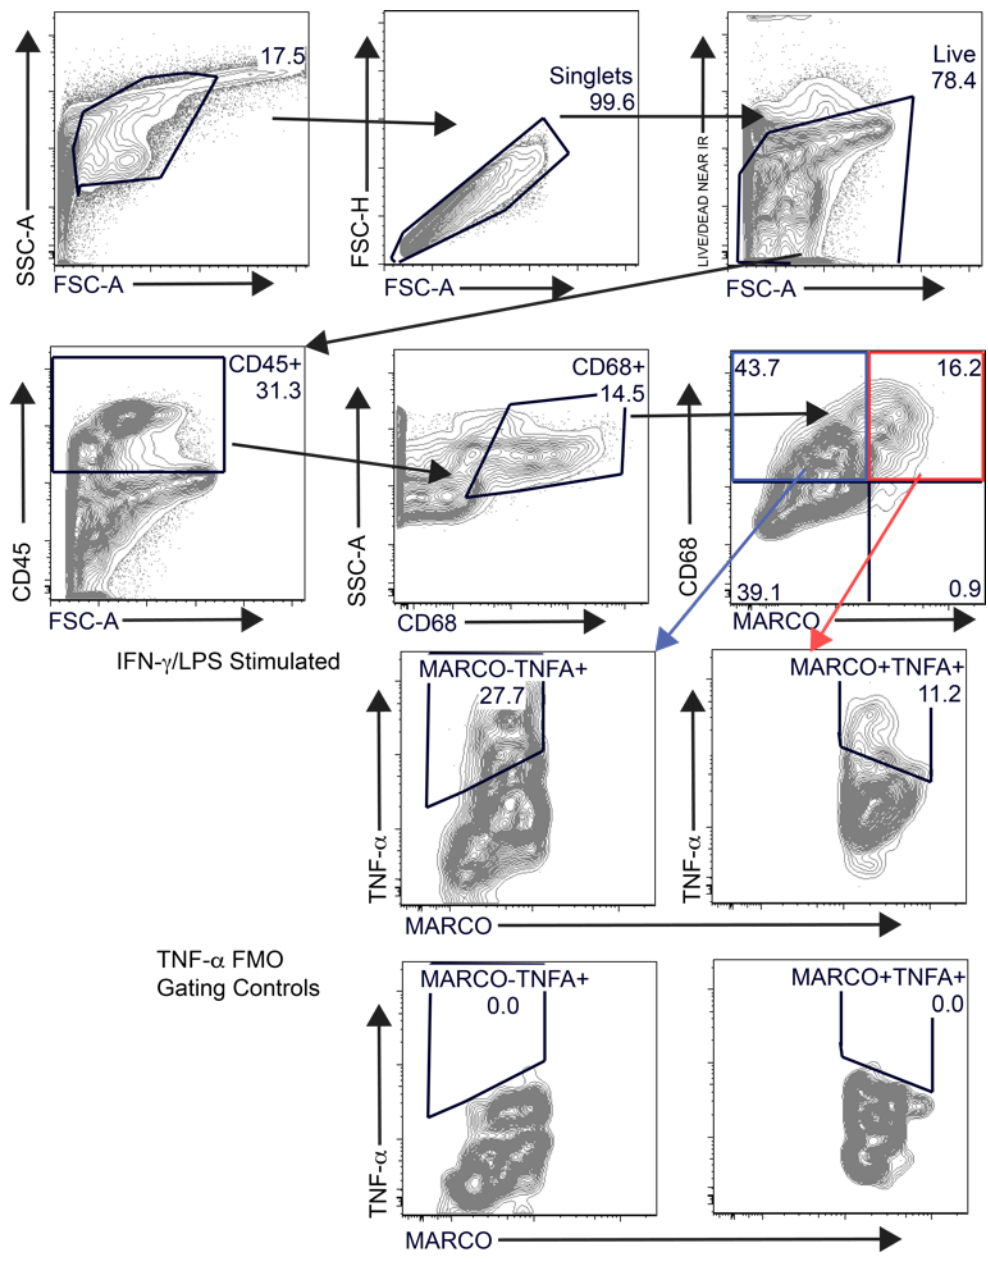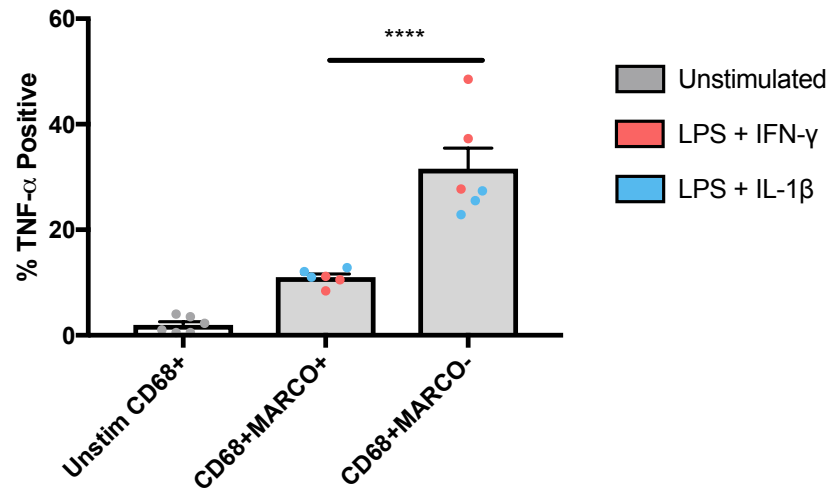

**Supplementary Figure 15: Gating Strategy for Fig. 8d.** Cell suspensions from TLH were stained with a live/dead aqua dye to label dead cells, fluorophore-conjugated monoclonal antibodies to human cell-surface markers anti-CD45-BV650 (Biolegend Clone: HI30), anti-CD68-PE (Biolegend Clone: Y1/82A), and anti-MARCO (rabbit anti-human polyclonal) (Thermofisher: PA5-26888); secondary donkey anti-rabbit-FITC (Invitrogen). Singlets were defined as having similar area and height measurements in forward scatter (FSC-A vs FSC-H). Gating strategy for cell surface markers was set based on background auto-fluorescence measured in unstained controls. MARCO staining was used to differentiate between the two predominant macrophage populations found in the liver. Gating for TNF- $\alpha$  secretion was set based on fluorescence-minus-one (FMO) controls. Error bars show standard error of the mean for 6 replicates. Statistical significance evaluated using a one-way analysis of variance (ANOVA) with a Bonferroni post-test \*\*\*\*P<0.0001.

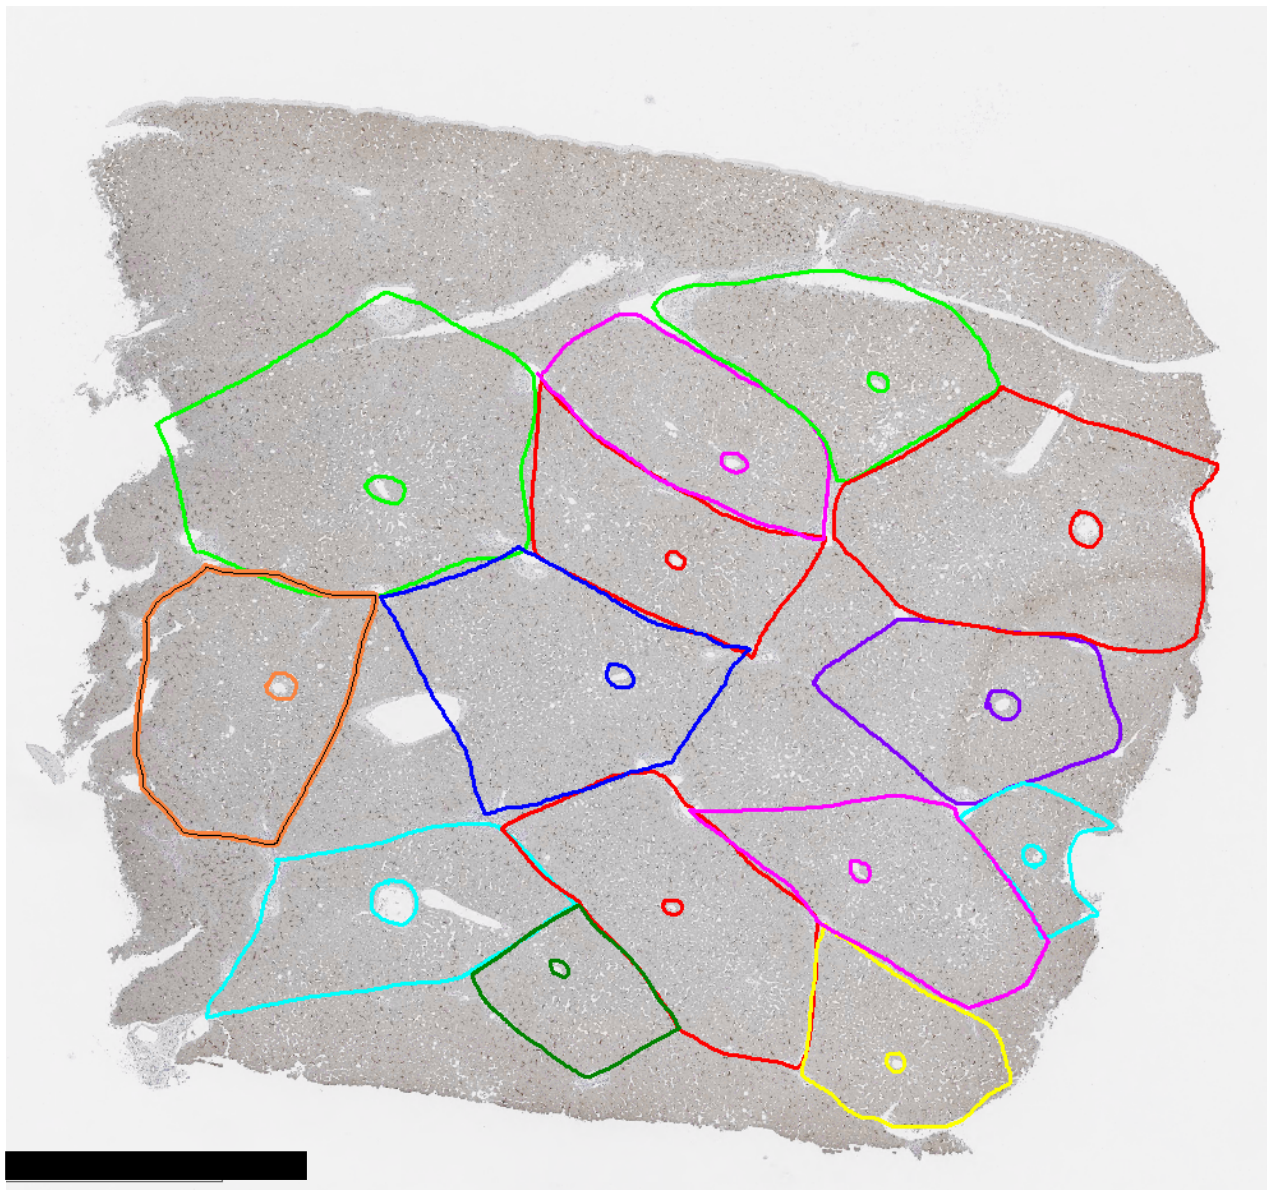

**Supplementary Figure 16: Representative partitioning of lobules for immunohistochemistry (Figure 8 e-f).** Lobules were defined by drawing a continuous line between portal triads around a single central vein using Halo software (Indica Labs, version). Each lobule was then concentrically partitioned into 10 layers between outer portal vein (layer 1) towards the central vein (layer 10). The positively stained area within each layer of the lobule (10 layers/lobule) was quantified and normalized to the area of the layer and presented as % positive stain. Scale bar indicates 2mm.

**CD68 40x mag**

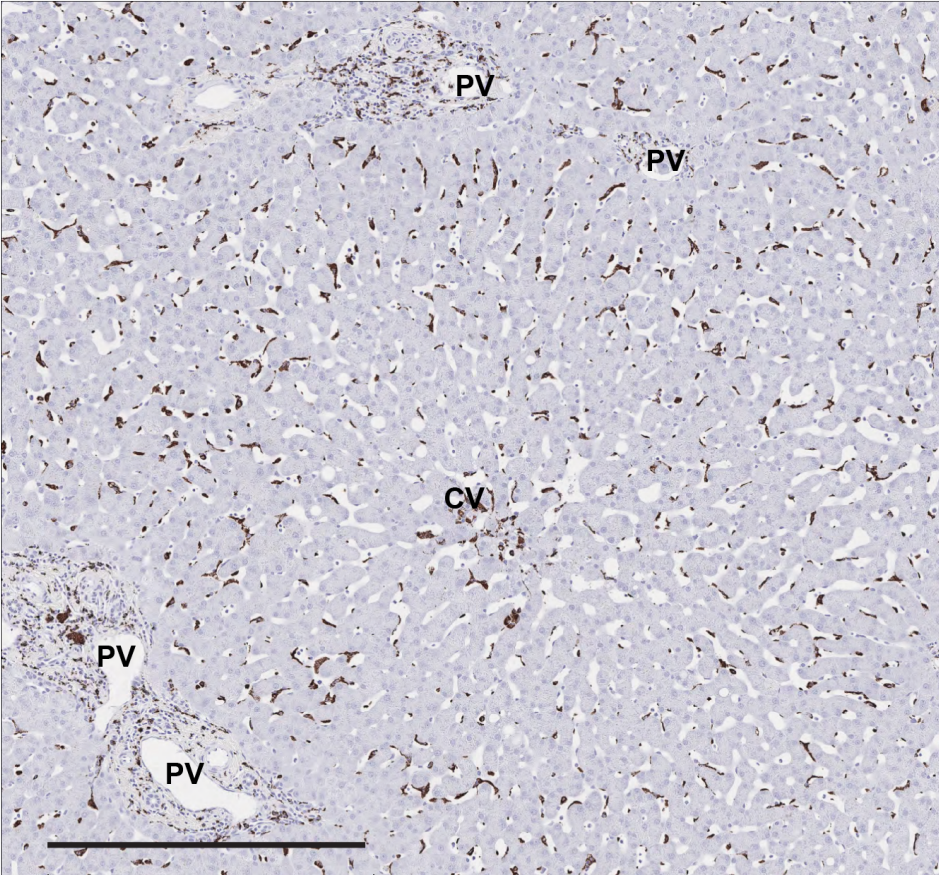

**MARCO 40x mag**

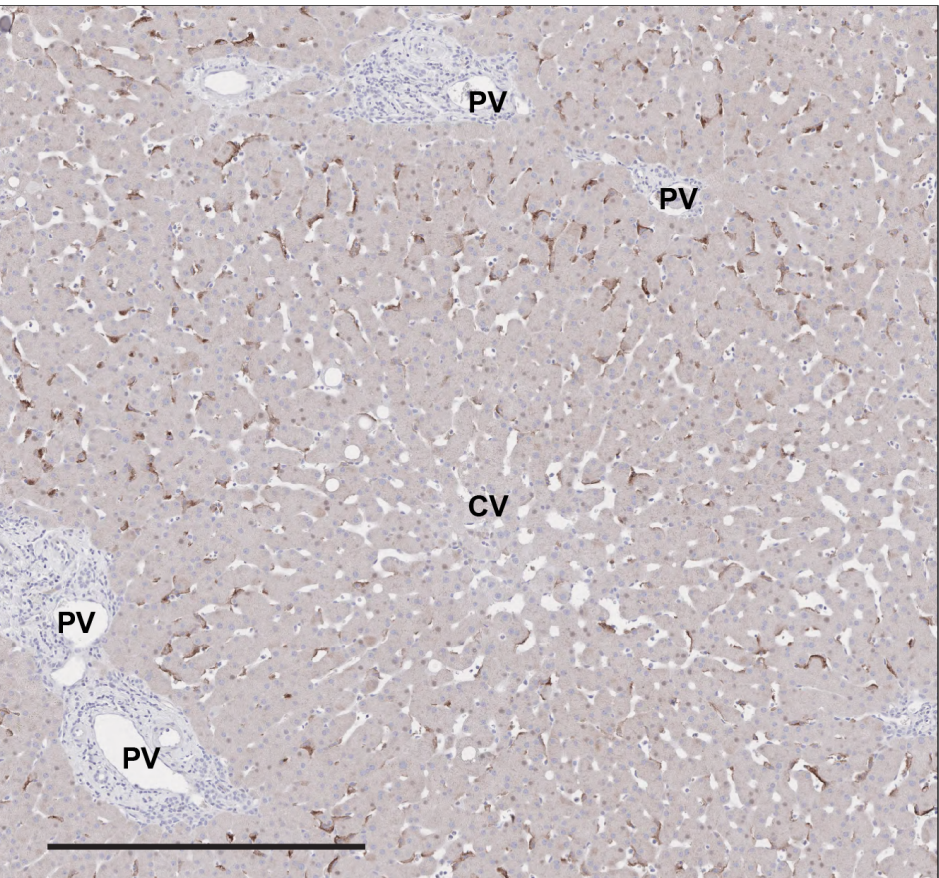



**Supplementary Figure 17: Distribution of macrophages by CD68 (general macrophage marker) vs. MARCO (non-inflammatory KCs).** Human liver tissue resected from neurologically deceased donors was cut into 4mm x 4mm x 4mm blocks and fixed in 10% formalin. resected from neurologically brain-dead donors. MARCO (Invitrogen, PA5-26888, 1:300) and CD68 (DAKO, PG-M1, 1:600) staining was performed on sequentially cut 7  $\mu$ m slides cut from paraffin-embedded liver tissue by the Toronto Pathology Research Program (Toronto General Hospital) using standard methods. Staining was performed with LT TE9 treated slides; primary antibodies were detected using a donkey anti-mouse or -human secondary antibody conjugated to HRP. Scale bar indicates 500 $\mu$ m.

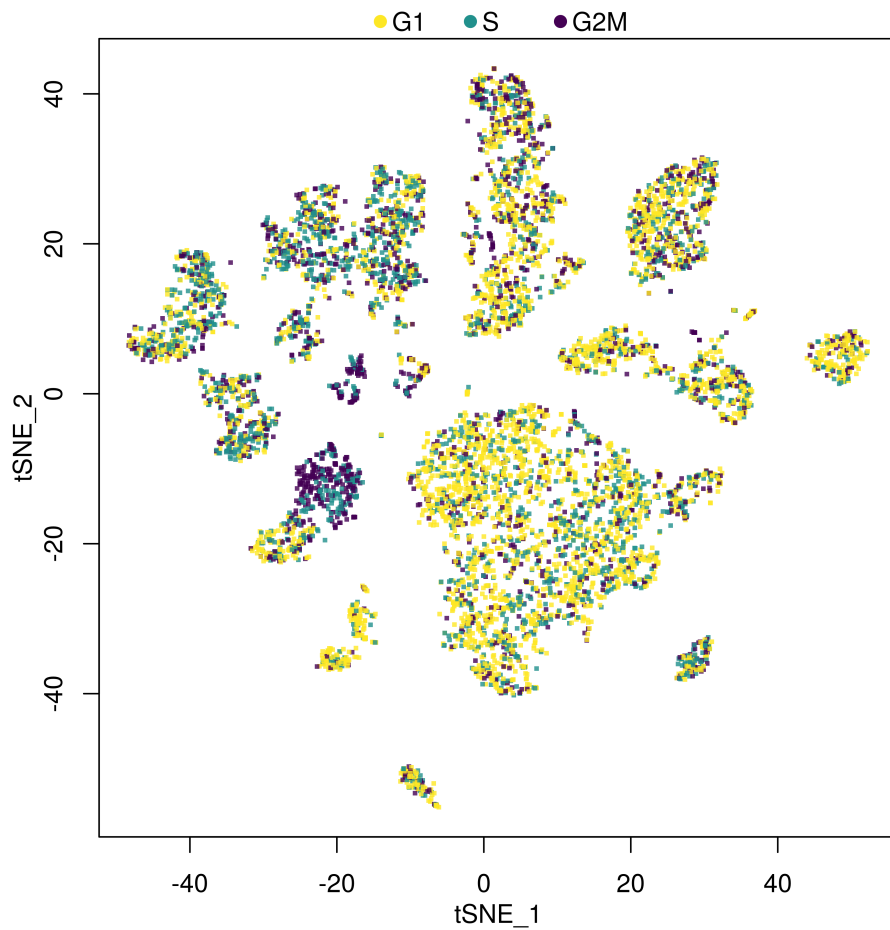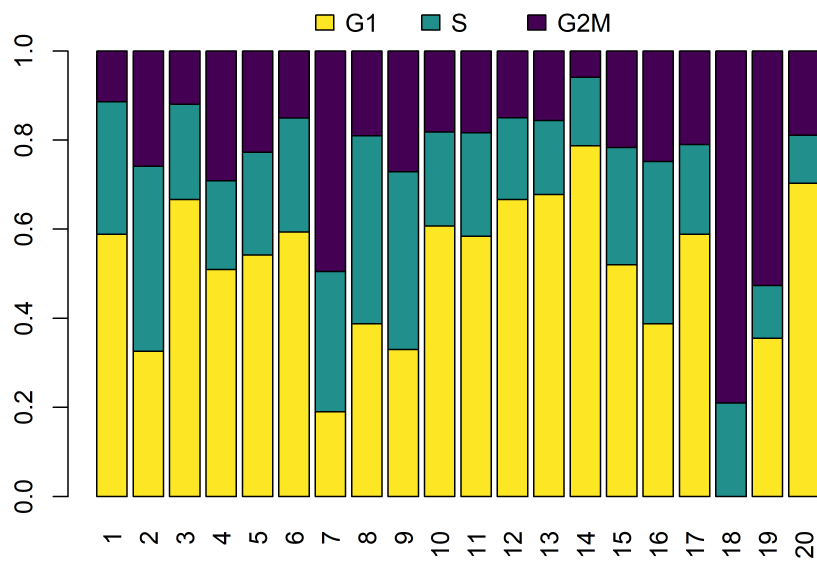

**Supplementary Figure 18: Cell cycle phase in each cluster.** Identification of cell cycle stage for 8444 cells profiled. G1-yellow, S-aqua, G2/M-purple. Cell cycle phases were predicted using the CellCycleScoring function in the Seurat R package.

a.

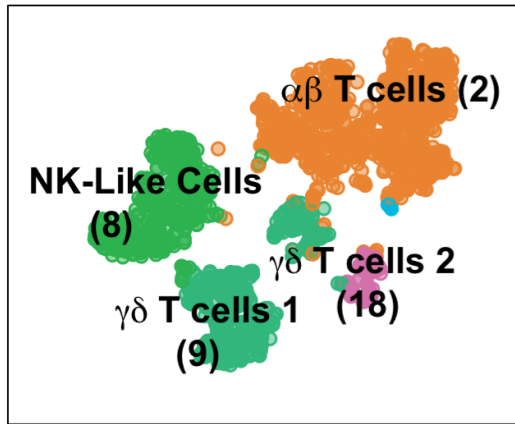

b.

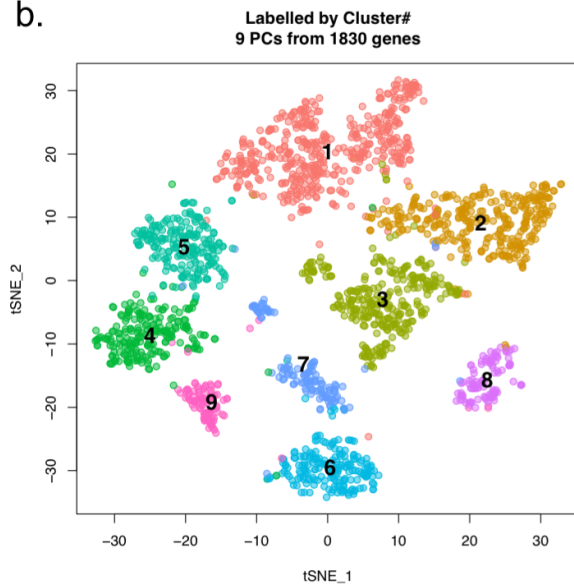

c.

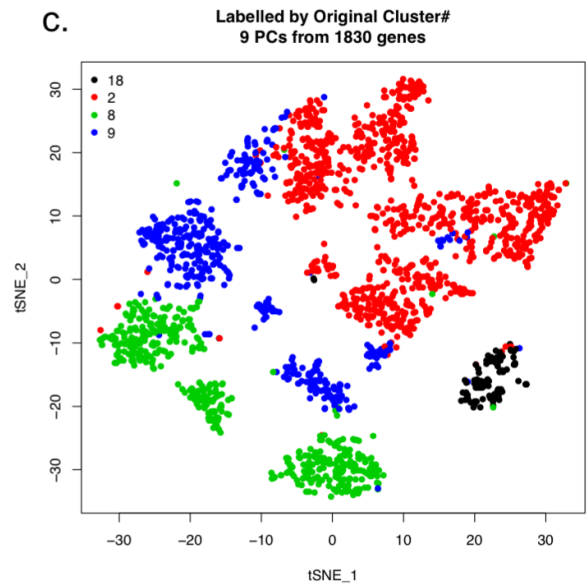

d.

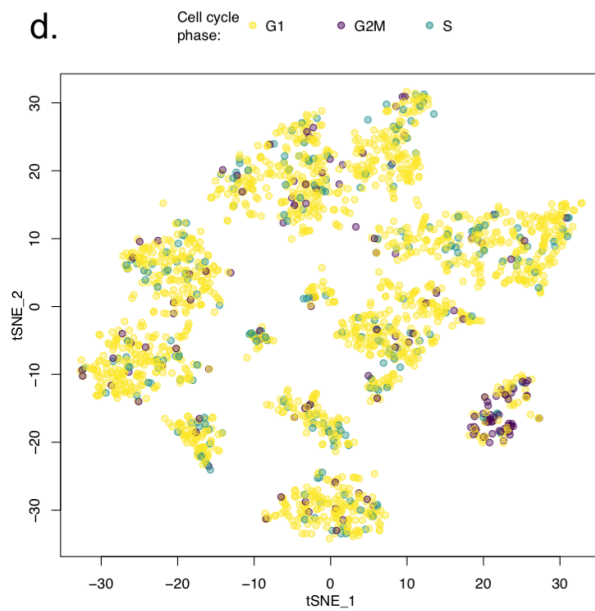

e.

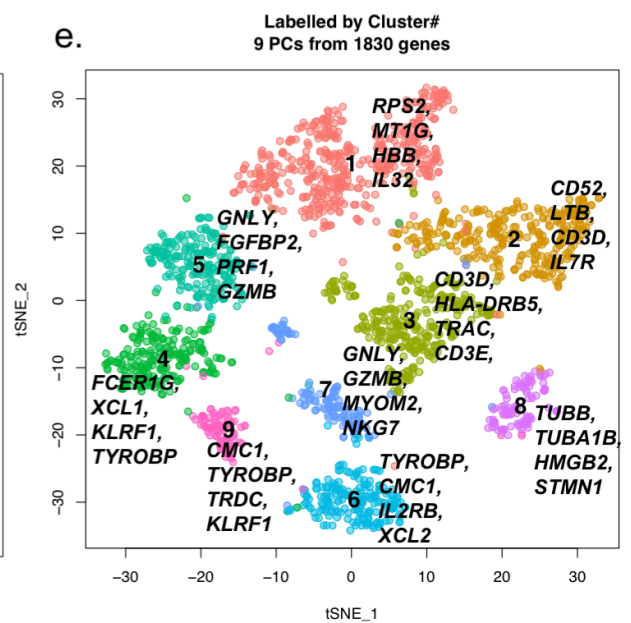

**Supplementary Figure 19: T and NK-like cell sub-analysis reveals additional distinct populations.** Potential conventional and non-conventional T cell and NK-like cell populations in (a-b) Clusters 2, 8, 9 and 18 were identified by rerunning dimensionality reduction and clustering analysis. (c) Newly identified clusters labelled by original cluster number. (d) Transcriptome-based heat map representation of cell cycle status (G1, G2/M, or S) in every cell within a cluster (as defined in (b)). (e) Cluster map of cell subpopulations with the top 4 differentially expressed genes indicated (ranked by p-value). Full Seurat Parameters: `FindClusters(Data,pc.use=1:9,print.output=F,save.SNN=T,resolution=0.4)`  
DE: differentially expressed; PCA: principal component analysis; *t*-SNE: t-distributed stochastic neighbor embedding; PCs: (Principal Components).

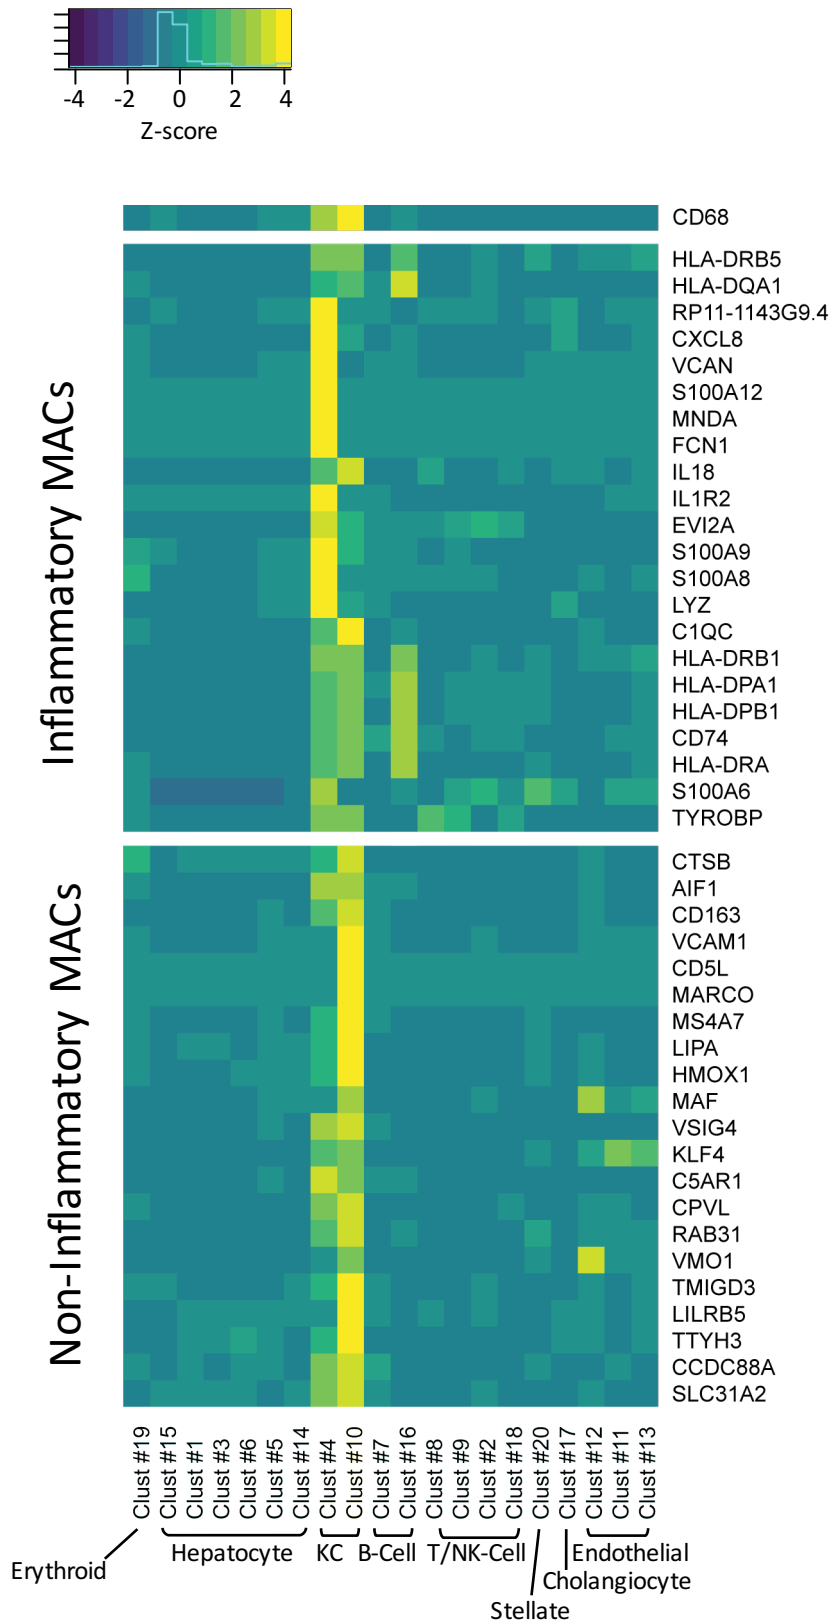

**Supplementary Figure 20. Heat map analysis showing gene expression profiles of liver resident macrophages/Kupffer cells.** The identity of each cluster was assigned by matching the cluster expression profile with established markers. Top differentially expressed genes expressed in each cell type are shown.

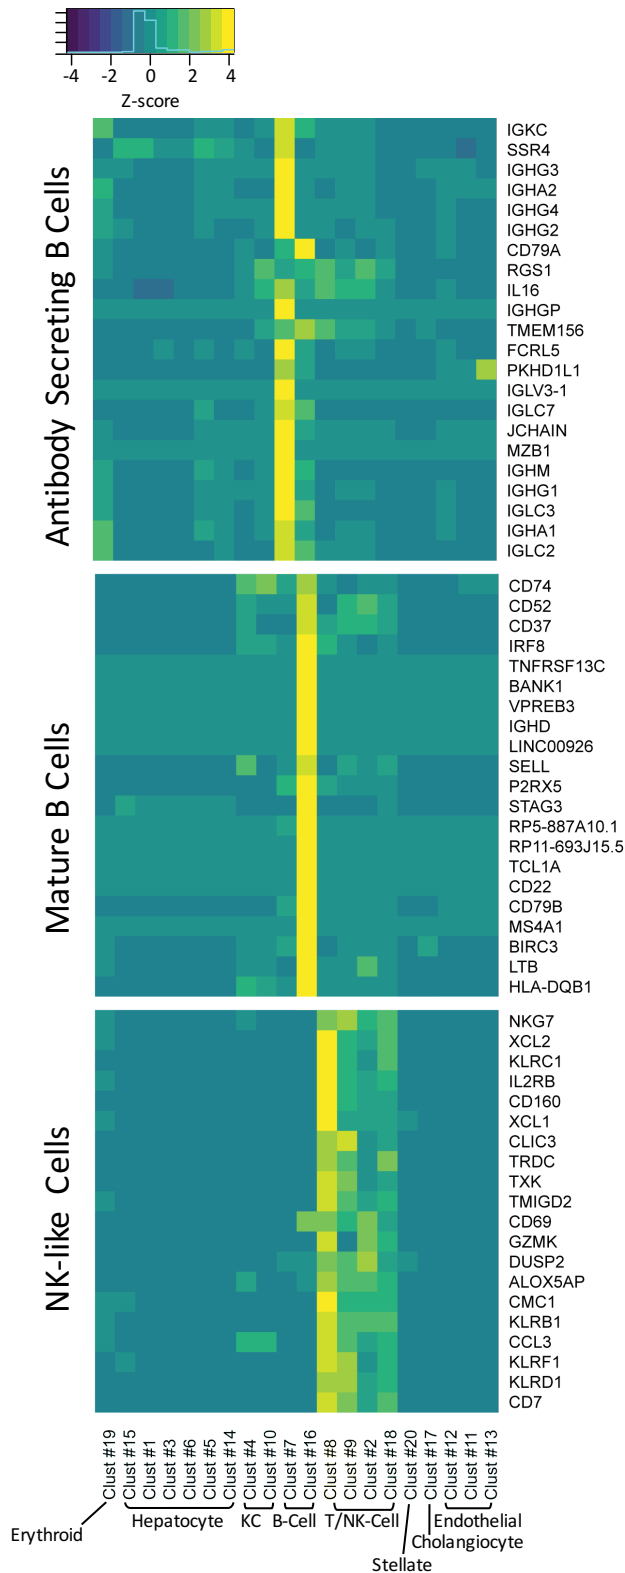

**Supplementary Figure 21. Heat map analysis showing gene expression profiles of NK-like and B cells.** The identity of each cluster was assigned by matching the cluster expression profile with established markers. Top differentially expressed genes expressed in each cell type are shown.

NK: natural killer

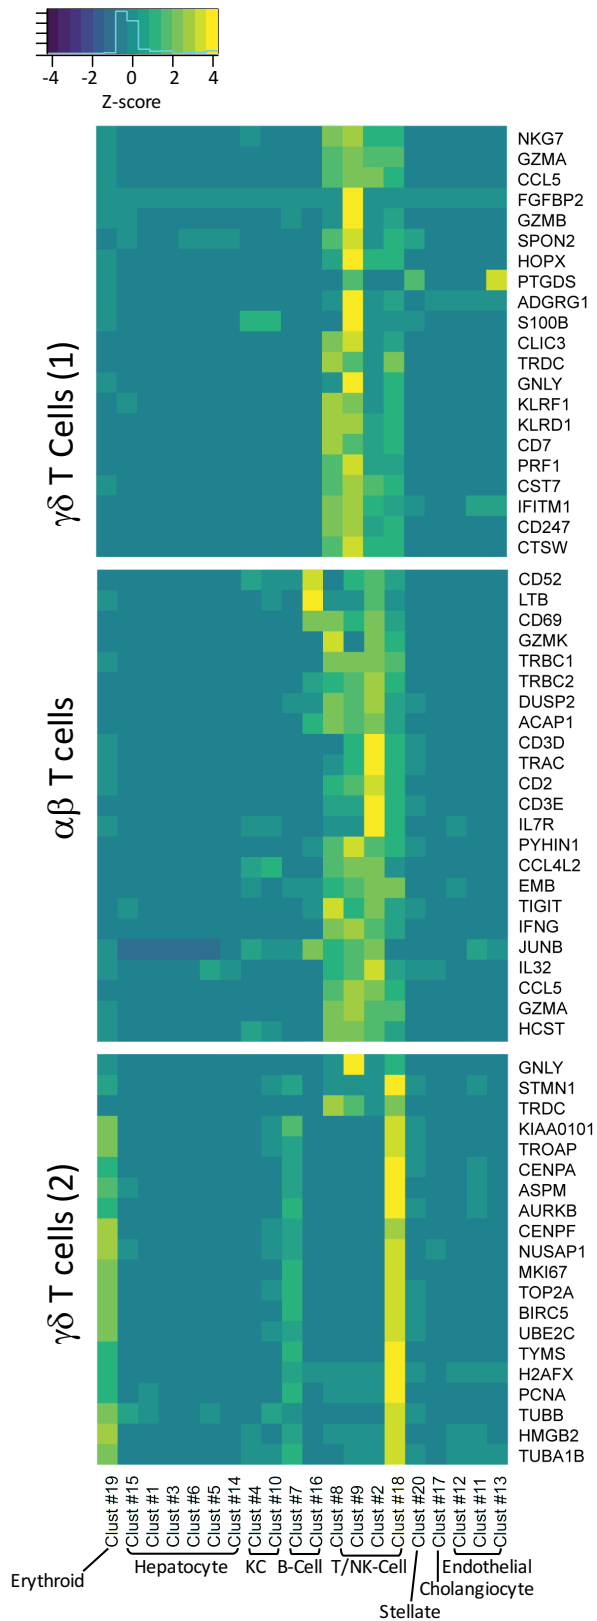

**Supplementary Figure 22. Heat map analysis showing gene expression profiles of T cells.** The identity of each cluster was assigned by matching the cluster expression profile with established markers. Top differentially expressed genes expressed in each cell type are shown.

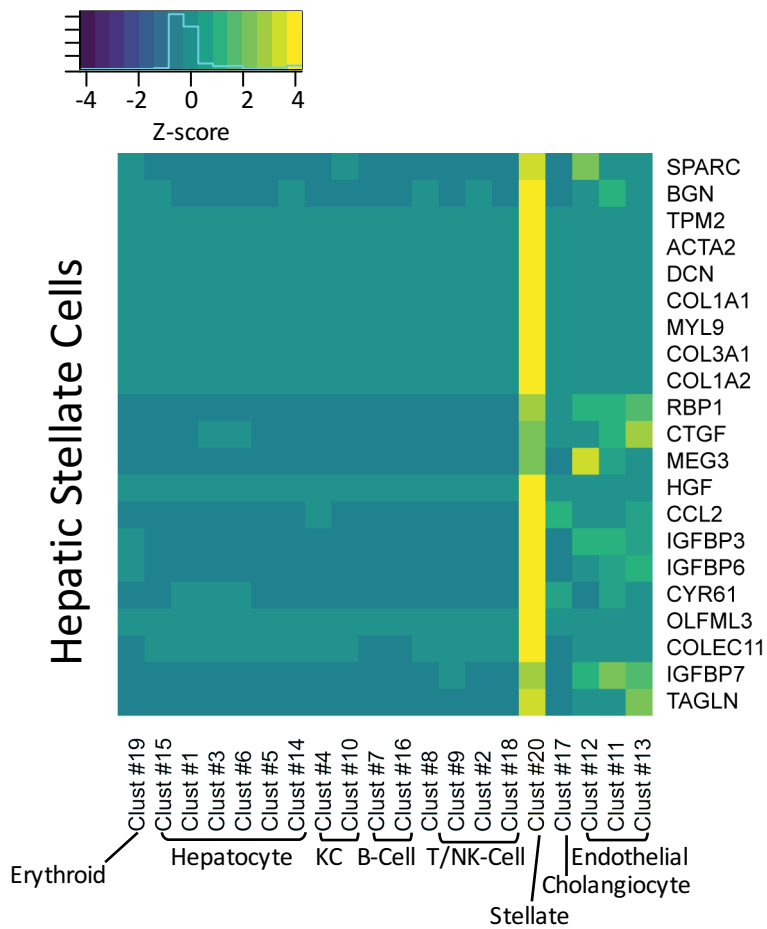

**Supplementary Figure 23. Heat map analysis showing gene expression profiles of hepatic stellate cells.** The identity of the cluster was assigned by matching the cluster expression profile with established markers. Top differentially expressed genes expressed in each cell type are shown.



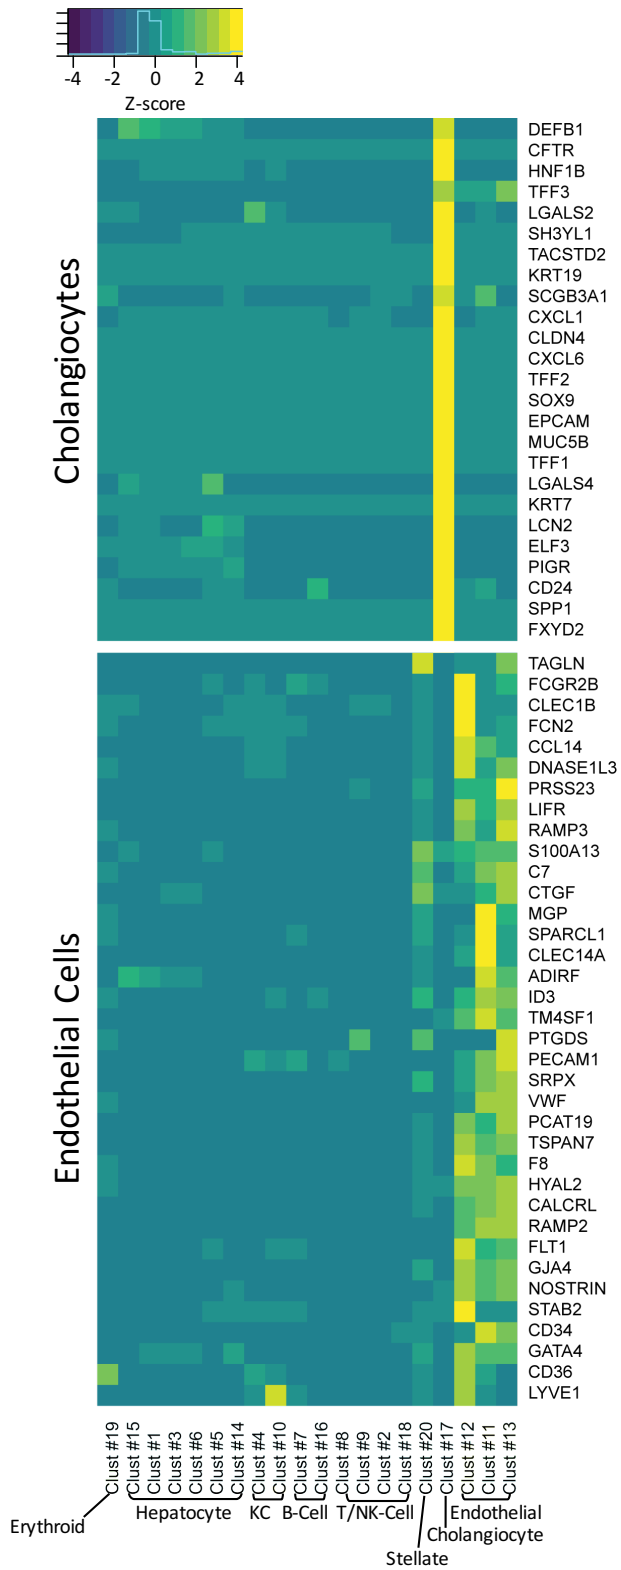

**Supplementary Figure 24. Heat map analysis showing gene expression profiles of endothelial cells and cholangiocytes.** The identity of each cluster was assigned by matching the cluster expression profile with established markers. Top differentially expressed genes expressed in each cell type are shown.

**Estimated Number of Cells**  
**1,771**

**Mean Reads per Cell**      **Median Genes per Cell**  
**261,567**                      **179**

**Sequencing**

|                                                |             |
|------------------------------------------------|-------------|
| Number of Reads                                | 463,236,917 |
| Valid Barcodes                                 | 98.6%       |
| Reads Mapped Confidently to Transcriptome      | 70.2%       |
| Reads Mapped Confidently to Exonic Regions     | 73.0%       |
| Reads Mapped Confidently to Intronic Regions   | 6.7%        |
| Reads Mapped Confidently to Intergenic Regions | 6.4%        |
| Reads Mapped Antisense to Gene                 | 2.3%        |
| Sequencing Saturation                          | 92.4%       |
| Q30 Bases in Barcode                           | 96.8%       |
| Q30 Bases in RNA Read                          | 78.4%       |
| Q30 Bases in Sample Index                      | 95.6%       |
| Q30 Bases in UMI                               | 97.4%       |

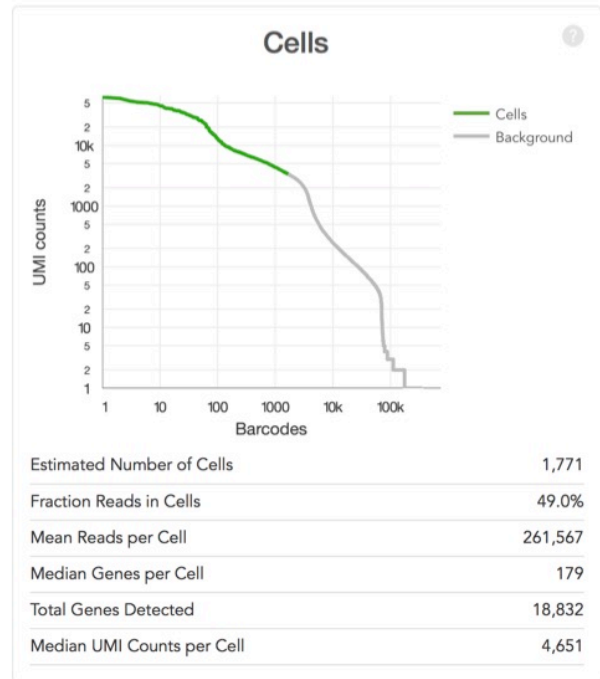

**Sample**

|                     |                          |
|---------------------|--------------------------|
| Name                | Total Liver Homogenate 1 |
| Description         |                          |
| Transcriptome       | GRCh38                   |
| Chemistry           | Single Cell 3' v2        |
| Cell Ranger Version | 2.0.0                    |

**Supplementary Figure 25: 10x Genomics Cell Ranger software summaries of unfiltered data from total liver homogenate 1.**

Estimated Number of Cells  
**5,189**

Mean Reads per Cell      Median Genes per Cell  
**103,549**                      **425**

### Sequencing

|                                                |             |
|------------------------------------------------|-------------|
| Number of Reads                                | 537,316,704 |
| Valid Barcodes                                 | 98.4%       |
| Reads Mapped Confidently to Transcriptome      | 31.8%       |
| Reads Mapped Confidently to Exonic Regions     | 33.7%       |
| Reads Mapped Confidently to Intronic Regions   | 5.9%        |
| Reads Mapped Confidently to Intergenic Regions | 5.3%        |
| Reads Mapped Antisense to Gene                 | 2.6%        |
| Sequencing Saturation                          | 85.7%       |
| Q30 Bases in Barcode                           | 96.5%       |
| Q30 Bases in RNA Read                          | 69.0%       |
| Q30 Bases in Sample Index                      | 95.2%       |
| Q30 Bases in UMI                               | 97.1%       |

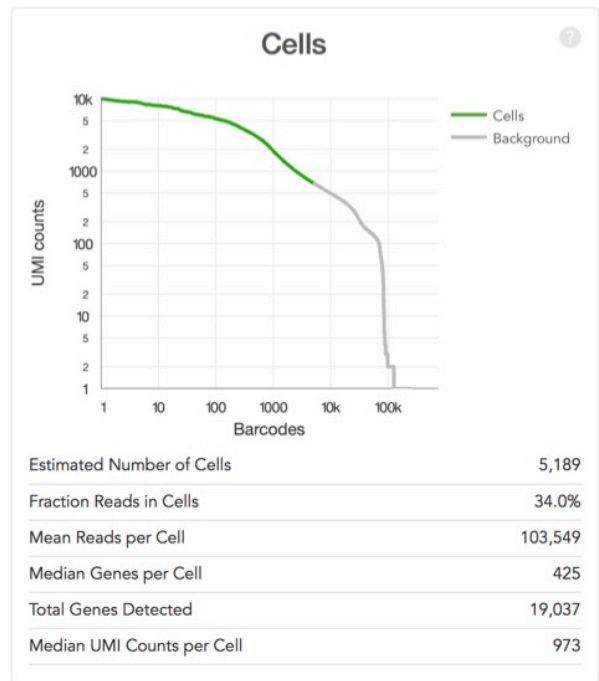

### Sample

|                     |                          |
|---------------------|--------------------------|
| Name                | Total Liver Homogenate 2 |
| Description         |                          |
| Transcriptome       | GRCh38                   |
| Chemistry           | Single Cell 3' v2        |
| Cell Ranger Version | 2.0.0                    |

**Supplementary Figure 26: 10x Genomics Cell Ranger software summaries of unfiltered data from total liver homogenate 2.**

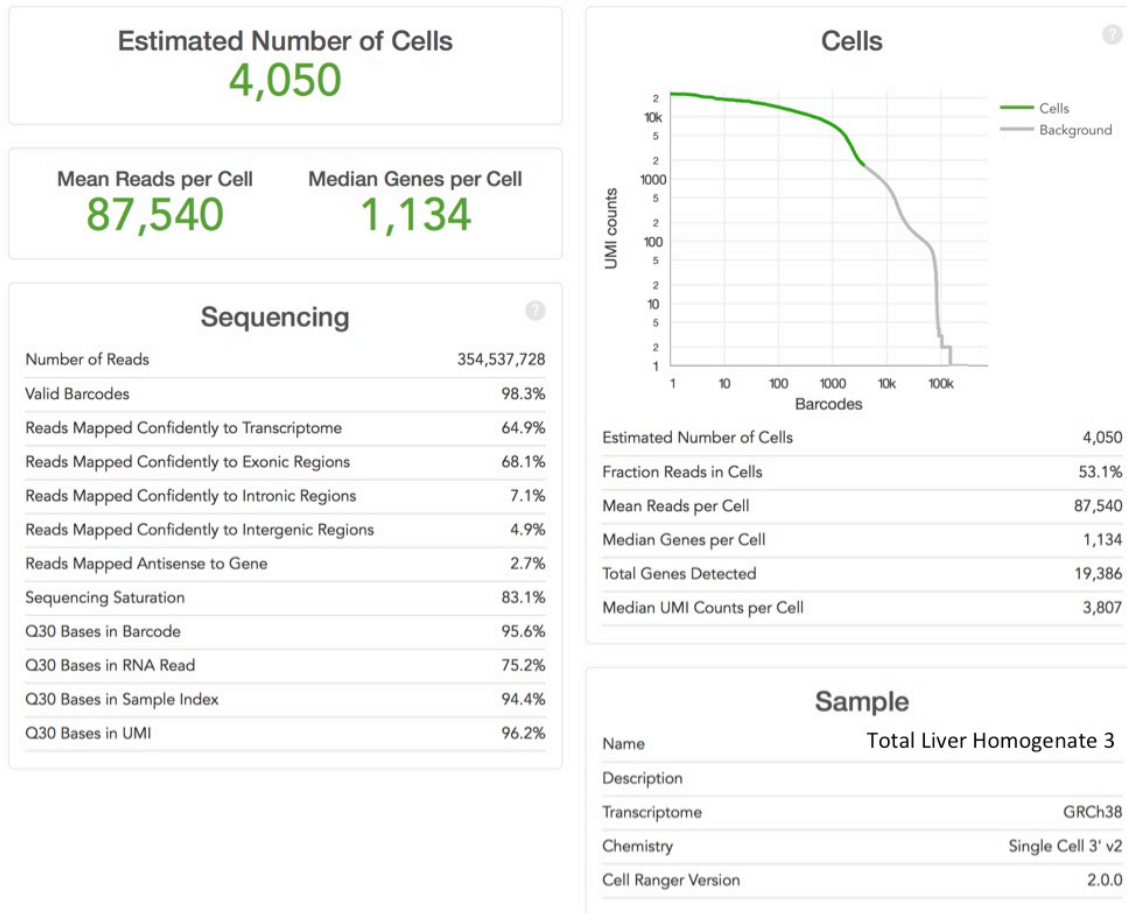

**Supplementary Figure 27: 10x Genomics Cell Ranger software summaries of unfiltered data from total liver homogenate 3.**

**Estimated Number of Cells**  
**1,974**

**Mean Reads per Cell**      **Median Genes per Cell**  
**232,564**                      **954**

**Sequencing**

|                                                |             |
|------------------------------------------------|-------------|
| Number of Reads                                | 459,081,940 |
| Valid Barcodes                                 | 98.3%       |
| Reads Mapped Confidently to Transcriptome      | 74.9%       |
| Reads Mapped Confidently to Exonic Regions     | 77.5%       |
| Reads Mapped Confidently to Intronic Regions   | 4.4%        |
| Reads Mapped Confidently to Intergenic Regions | 9.3%        |
| Reads Mapped Antisense to Gene                 | 2.0%        |
| Sequencing Saturation                          | 84.6%       |
| Q30 Bases in Barcode                           | 95.6%       |
| Q30 Bases in RNA Read                          | 75.8%       |
| Q30 Bases in Sample Index                      | 94.4%       |
| Q30 Bases in UMI                               | 96.2%       |

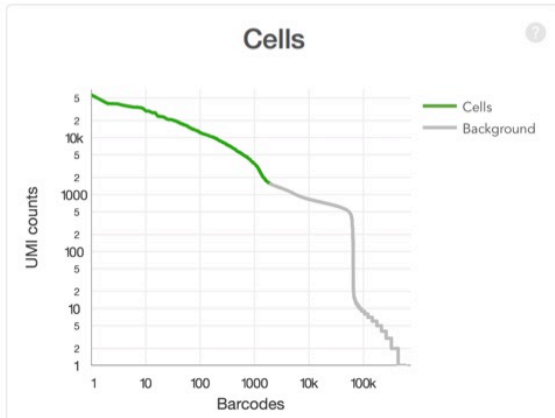

|                            |         |
|----------------------------|---------|
| Estimated Number of Cells  | 1,974   |
| Fraction Reads in Cells    | 19.2%   |
| Mean Reads per Cell        | 232,564 |
| Median Genes per Cell      | 954     |
| Total Genes Detected       | 19,380  |
| Median UMI Counts per Cell | 3,514   |

**Sample**

|                     |                          |
|---------------------|--------------------------|
| Name                | Total Liver Homogenate 4 |
| Description         |                          |
| Transcriptome       | GRCh38                   |
| Chemistry           | Single Cell 3' v2        |
| Cell Ranger Version | 2.0.0                    |

**Supplementary Figure 28: 10x Genomics Cell Ranger software summaries of unfiltered data from total liver homogenate 4.**

Estimated Number of Cells  
**5,461**

Mean Reads per Cell      Median Genes per Cell  
**68,150**                      **205**

**Sequencing**

|                                                |             |
|------------------------------------------------|-------------|
| Number of Reads                                | 372,170,107 |
| Valid Barcodes                                 | 98.2%       |
| Reads Mapped Confidently to Transcriptome      | 70.6%       |
| Reads Mapped Confidently to Exonic Regions     | 73.3%       |
| Reads Mapped Confidently to Intronic Regions   | 8.3%        |
| Reads Mapped Confidently to Intergenic Regions | 8.0%        |
| Reads Mapped Antisense to Gene                 | 2.1%        |
| Sequencing Saturation                          | 84.5%       |
| Q30 Bases in Barcode                           | 96.2%       |
| Q30 Bases in RNA Read                          | 80.6%       |
| Q30 Bases in Sample Index                      | 95.1%       |
| Q30 Bases in UMI                               | 96.7%       |

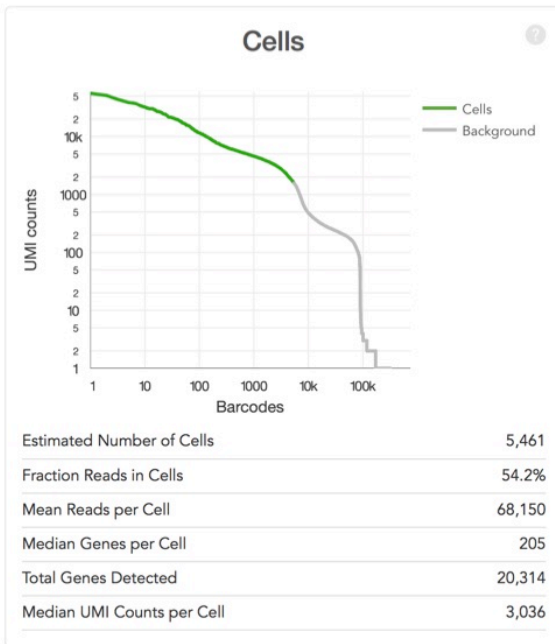

**Sample**

|                     |                          |
|---------------------|--------------------------|
| Name                | Total Liver Homogenate 5 |
| Description         |                          |
| Transcriptome       | GRCh38                   |
| Chemistry           | Single Cell 3' v2        |
| Cell Ranger Version | 2.0.0                    |

**Supplementary Figure 29: 10x Genomics Cell Ranger software summaries of unfiltered data from total liver homogenate 5.**

| Liver Sample Number | Age | Sex | Race  | BMI  | Caudate Weight (g) | Cause of Death | Mechanism                   | Serologies | Smoking             | Alcohol-use       | Drug-use                    |
|---------------------|-----|-----|-------|------|--------------------|----------------|-----------------------------|------------|---------------------|-------------------|-----------------------------|
| 1                   | 44  | M   | N/A   | 30.5 | NA                 | Head Trauma    | Fall                        | CMV        | 1/2 pack/d over 40y | daily (alcoholic) | marijuana - infrequent      |
| 2                   | 65  | M   | White | 31.7 | 24.89              | Head Trauma    | Unknown                     | CMV, EBV   | not reported        | not reported      | not reported                |
| 3                   | 41  | F   | White | 37.1 | 41.89              | Brain aneurysm | aneurysmal rupture          | EBV        | 1/2 pack/d over 25y | socially          | not reported                |
| 4                   | 21  | M   | White | 28.1 | 23.49              | Anoxia         | Drug overdose               | N/A        | 1/2 pack/d over 10y | heavy             | medicinal marijuana, heroin |
| 5                   | 26  | M   | Black | 28.4 | 30.47              | Stroke         | Dural arteriovenous fistula | EBV        | not reported        | not reported      | not reported                |

All donors meet NDD criteria

**Supplementary Table 1: Neurologically deceased liver donor details.** BMI: Body mass index, NDD: Neurologically deceased donor, CMV: Cytomegalovirus, EBV: Epstein-Barr virus.
